# Supplementary material for: Rectal Cancer in a Patient with Bartter Syndrome: A Case Report
Source: MDPI journal article supplement (doi:10.3390/genes8050139), 2017-05-12

# Supplementary Figure1

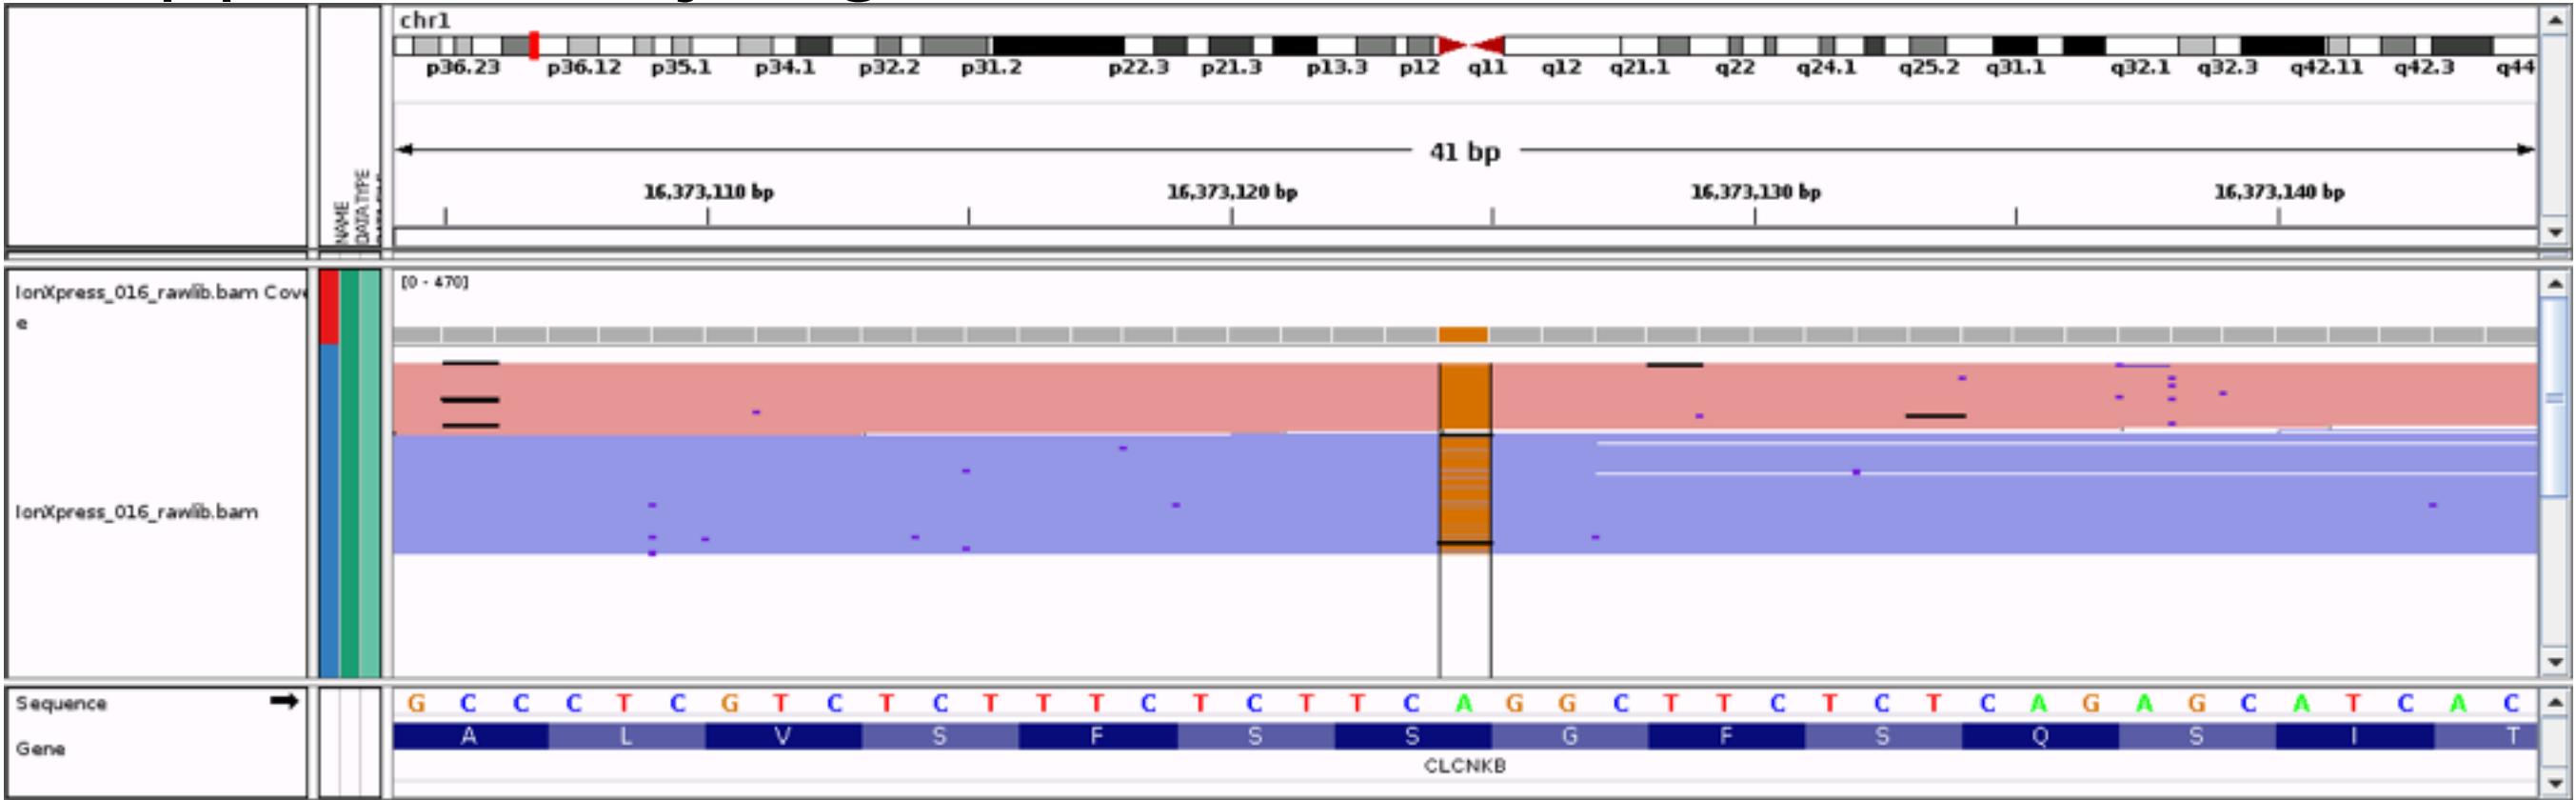

# Supplementary Figure2

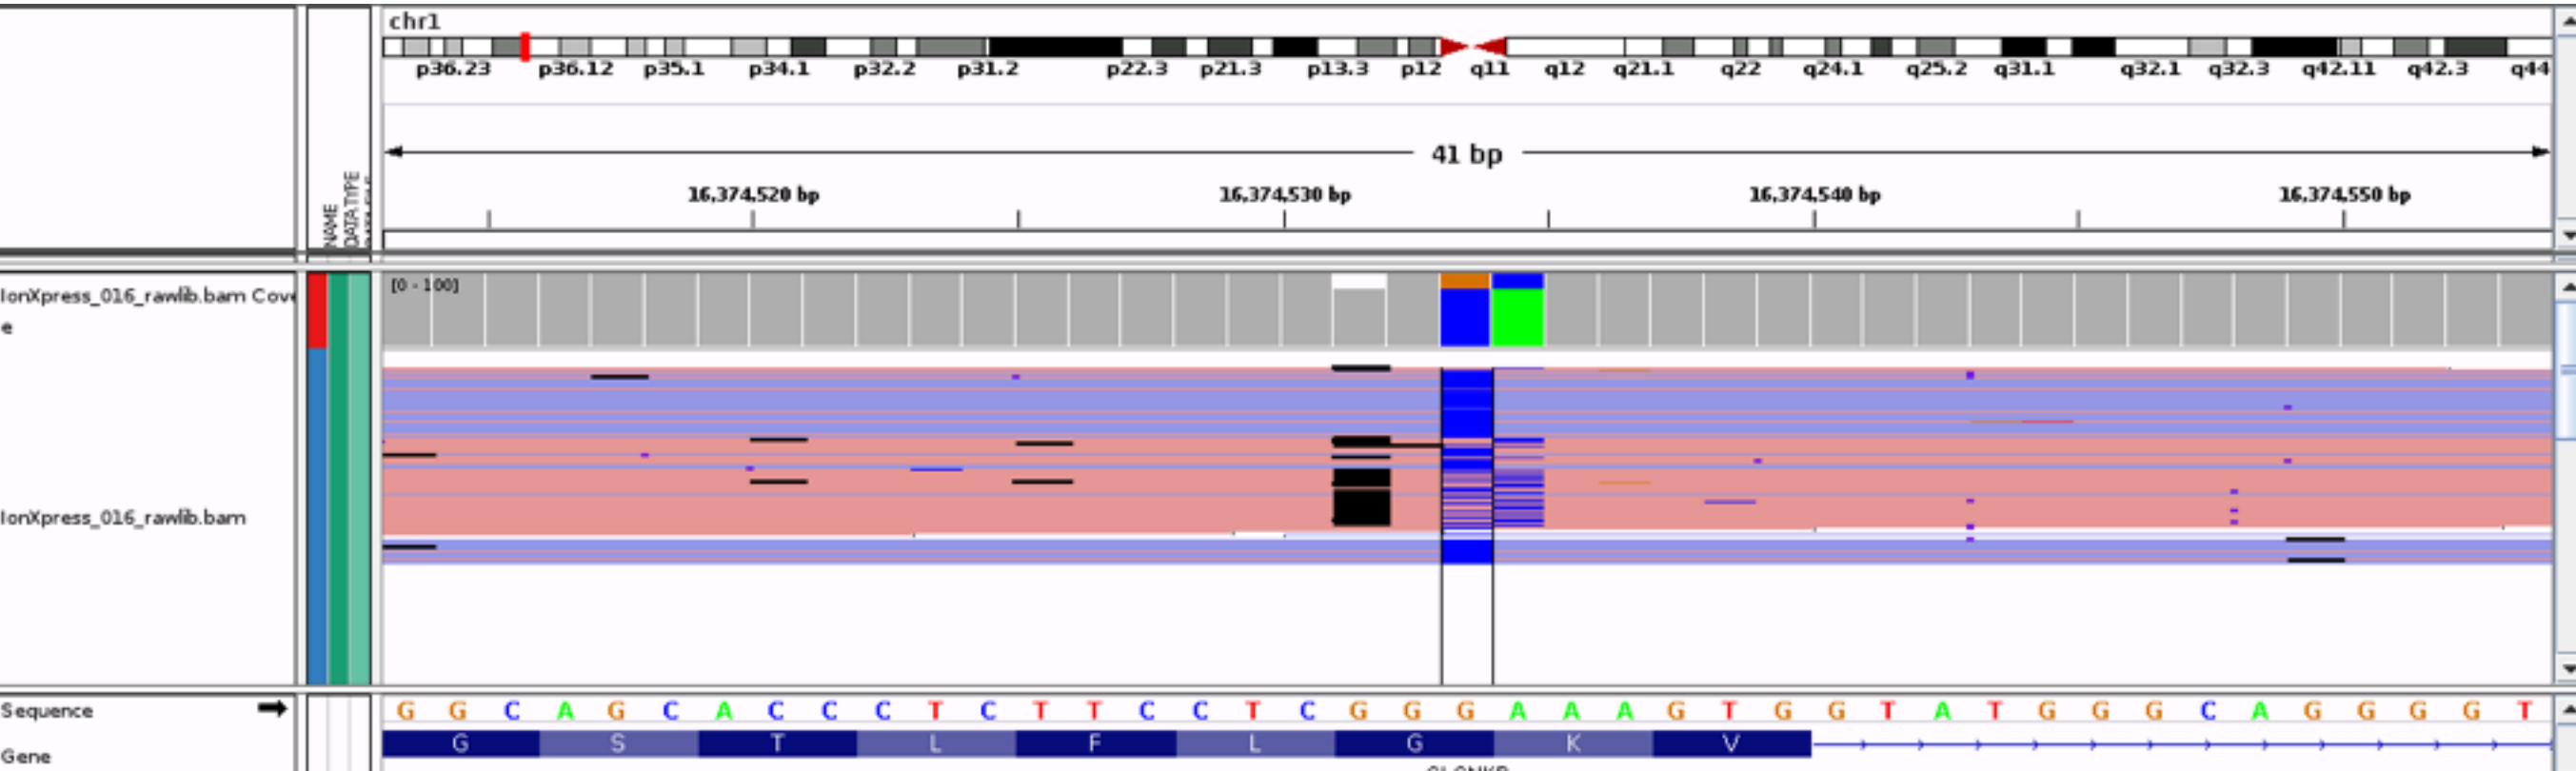

Supplementary Figure3

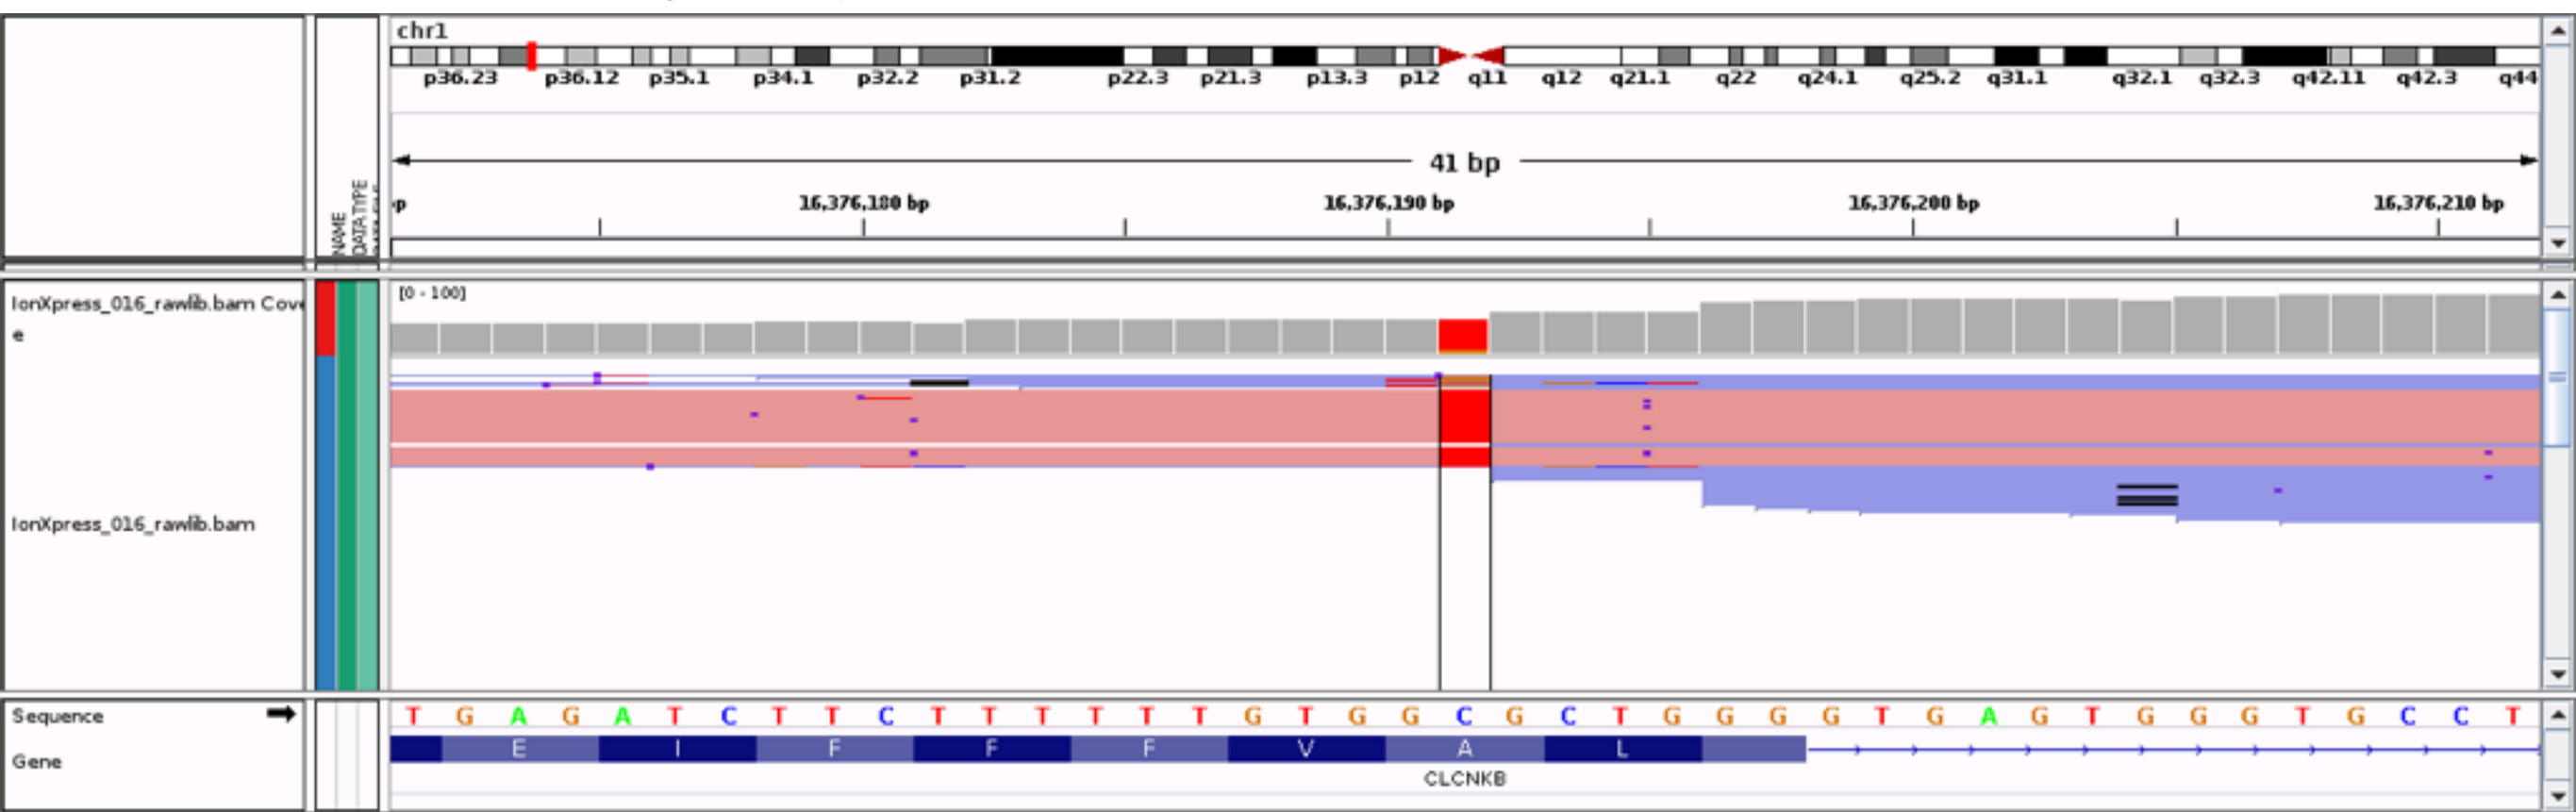

Supplementary Figure4

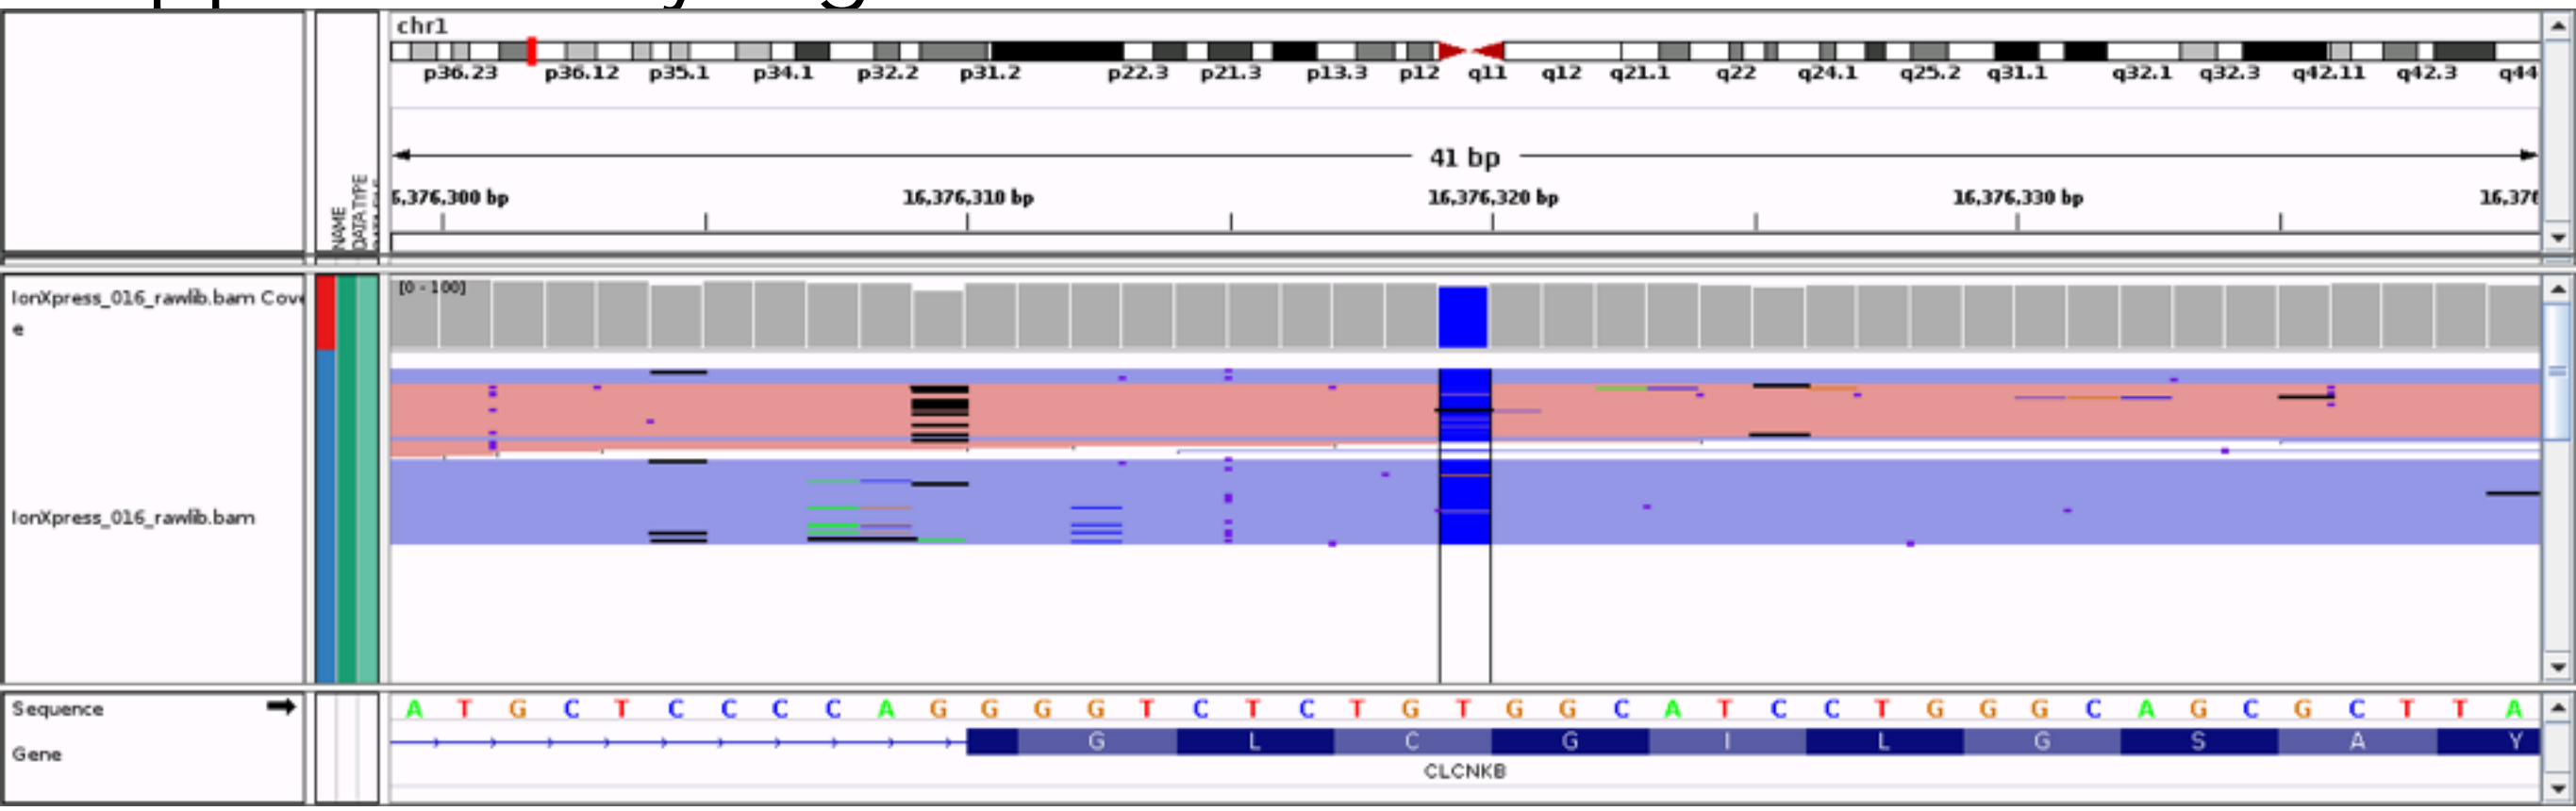

# Supplementary Figure5

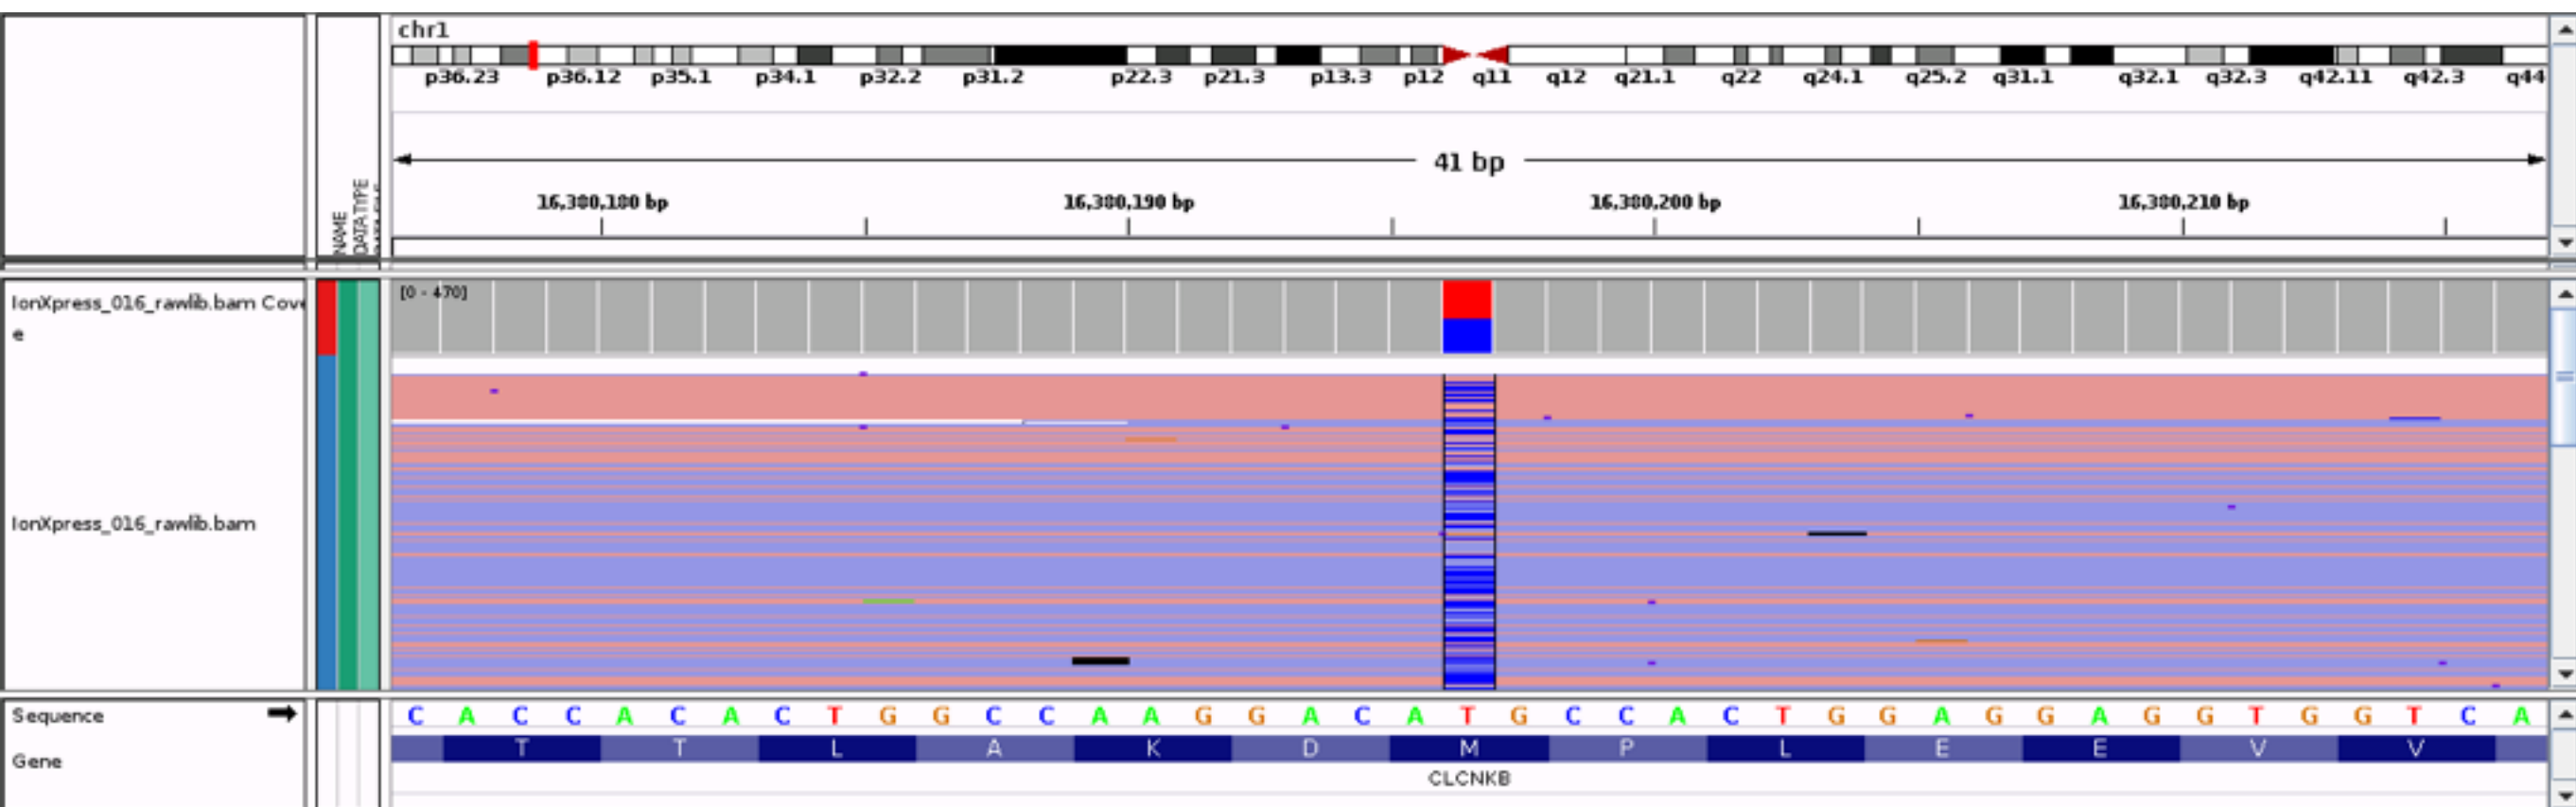

# Supplementary Figure6

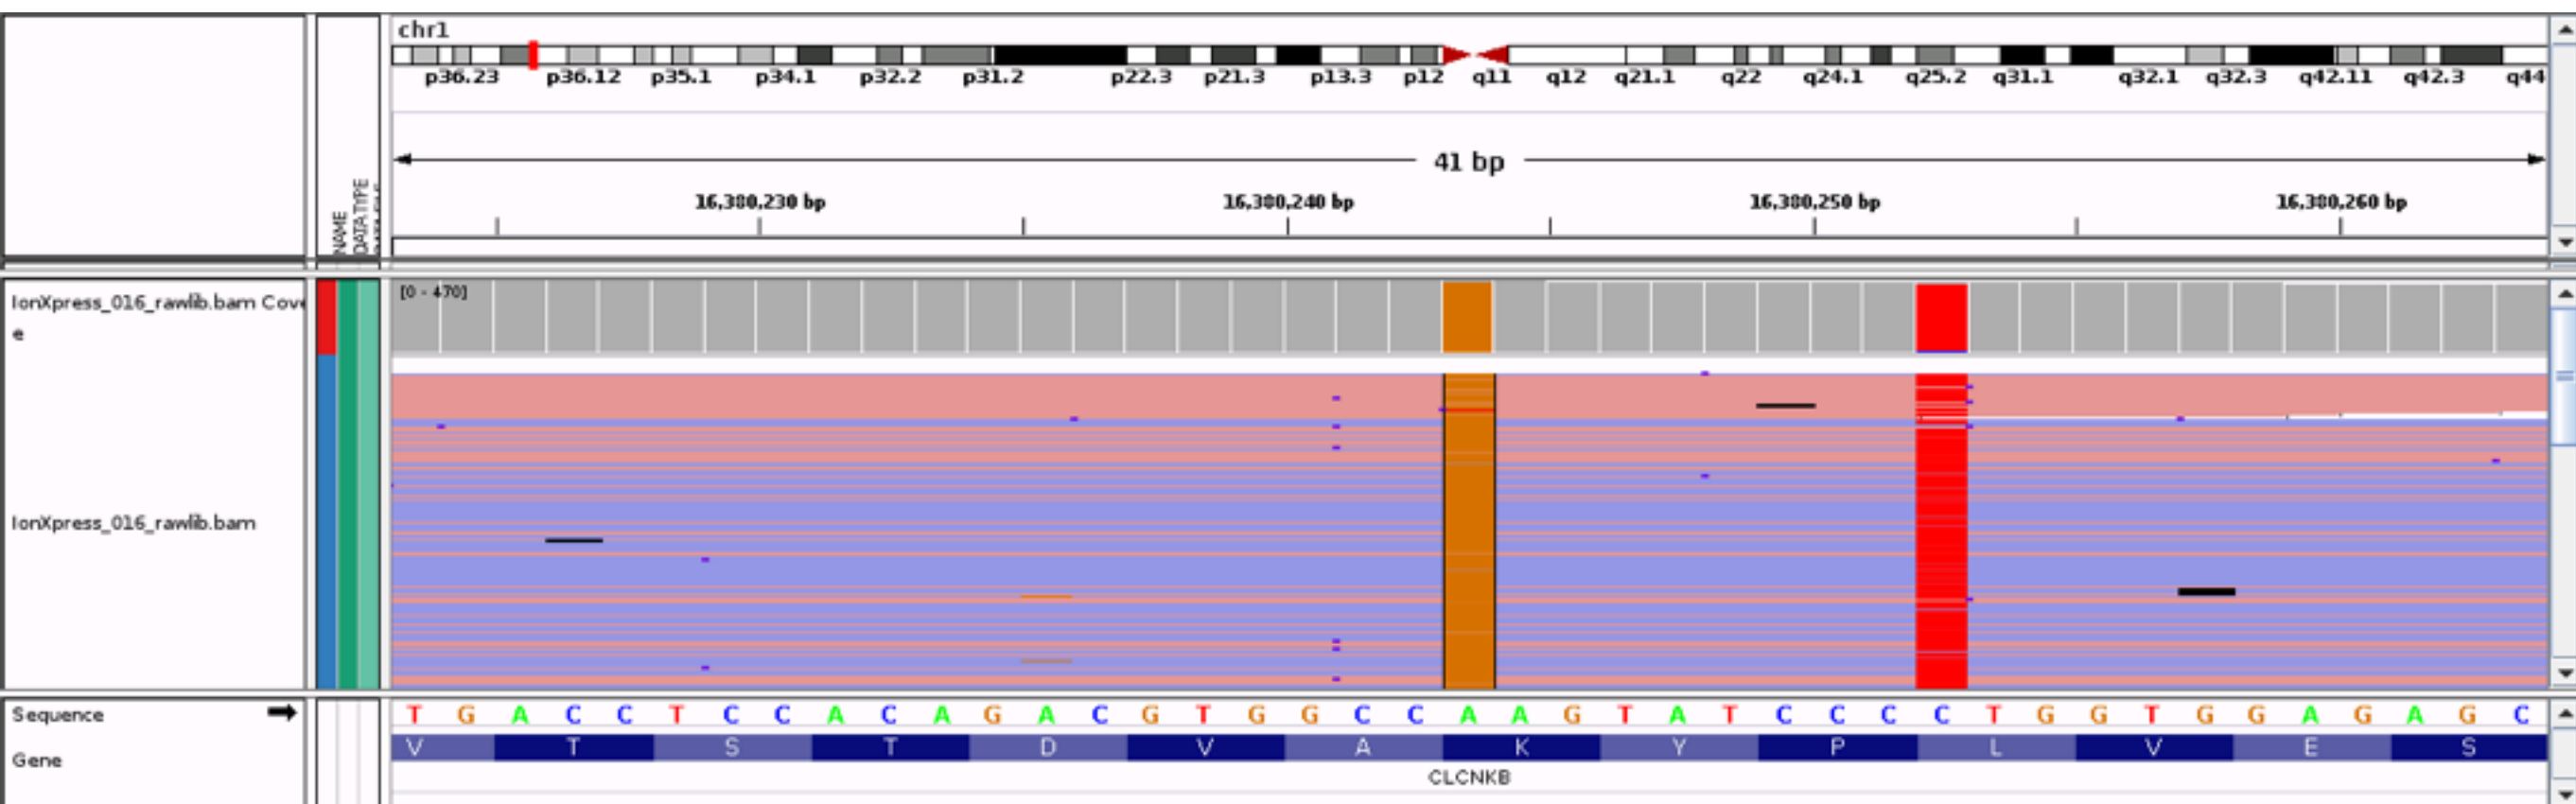

# Supplementary Figure7

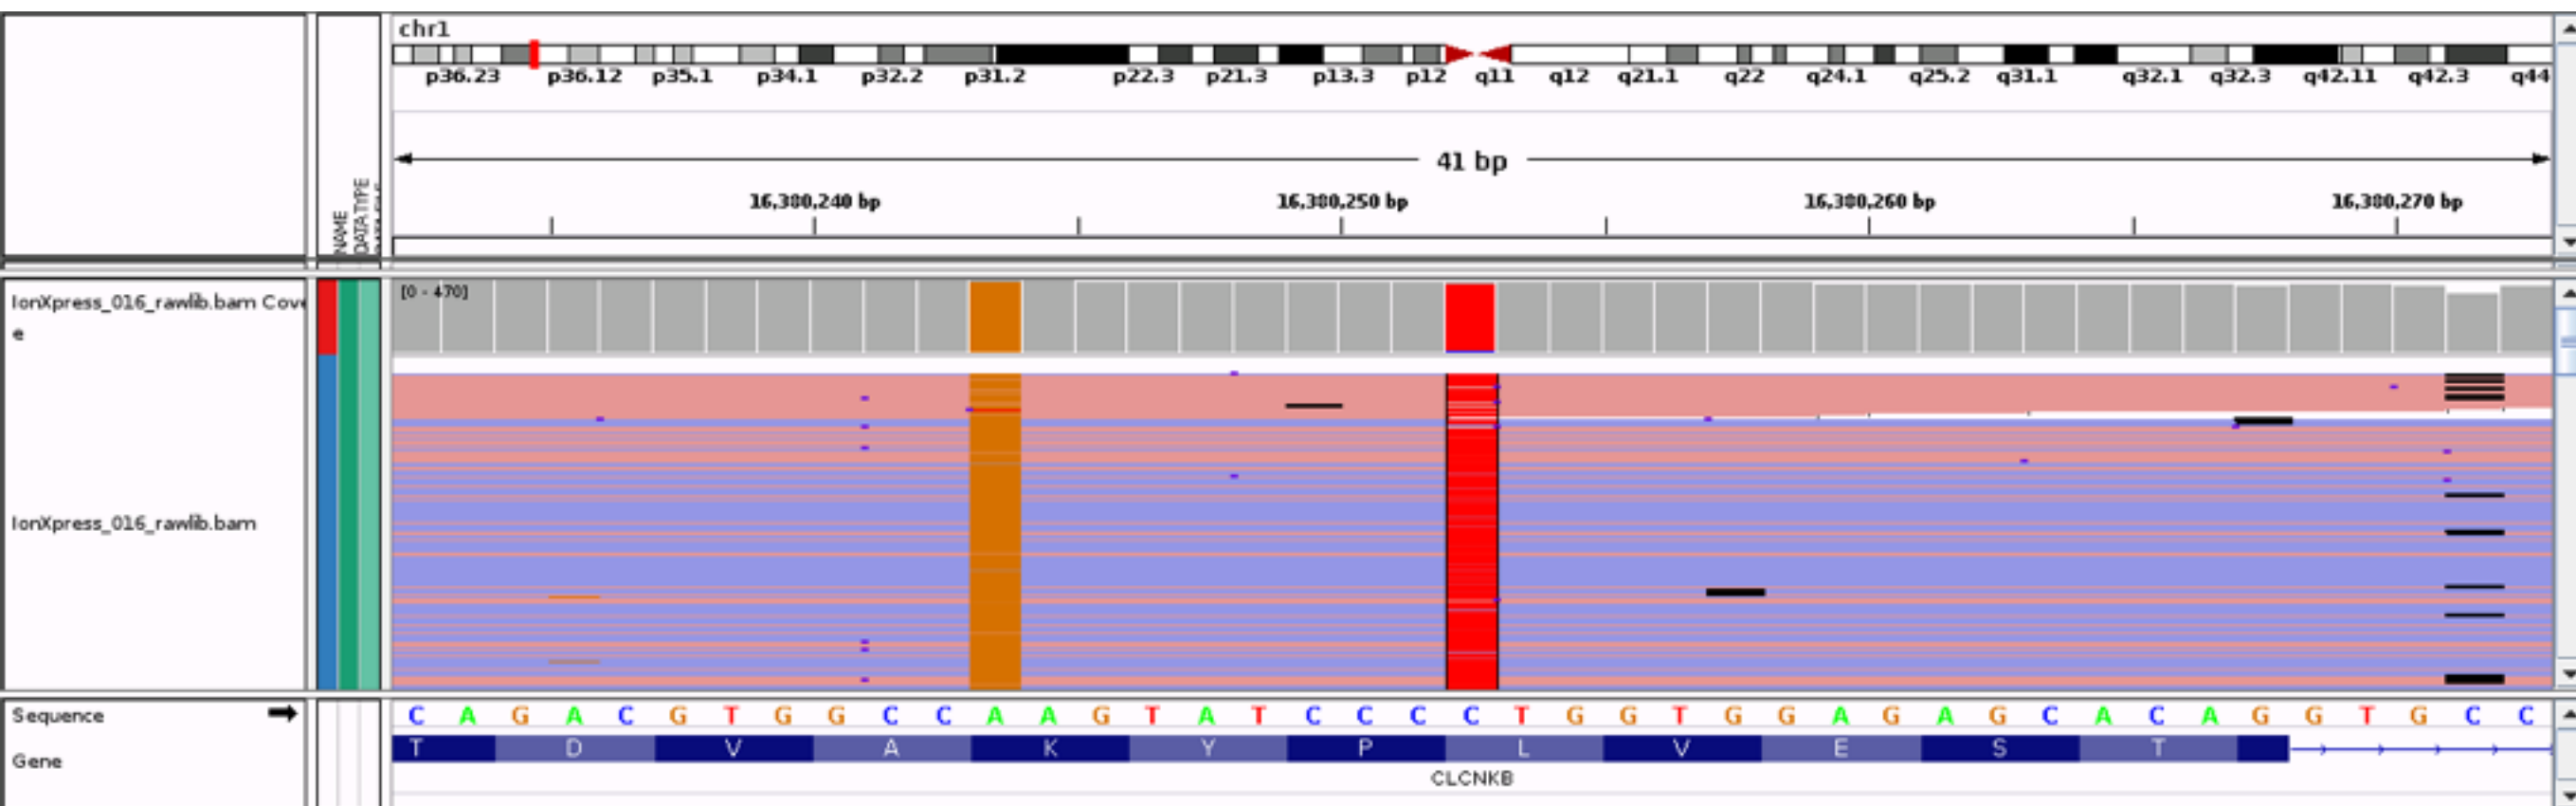

# Supplementary Figure8

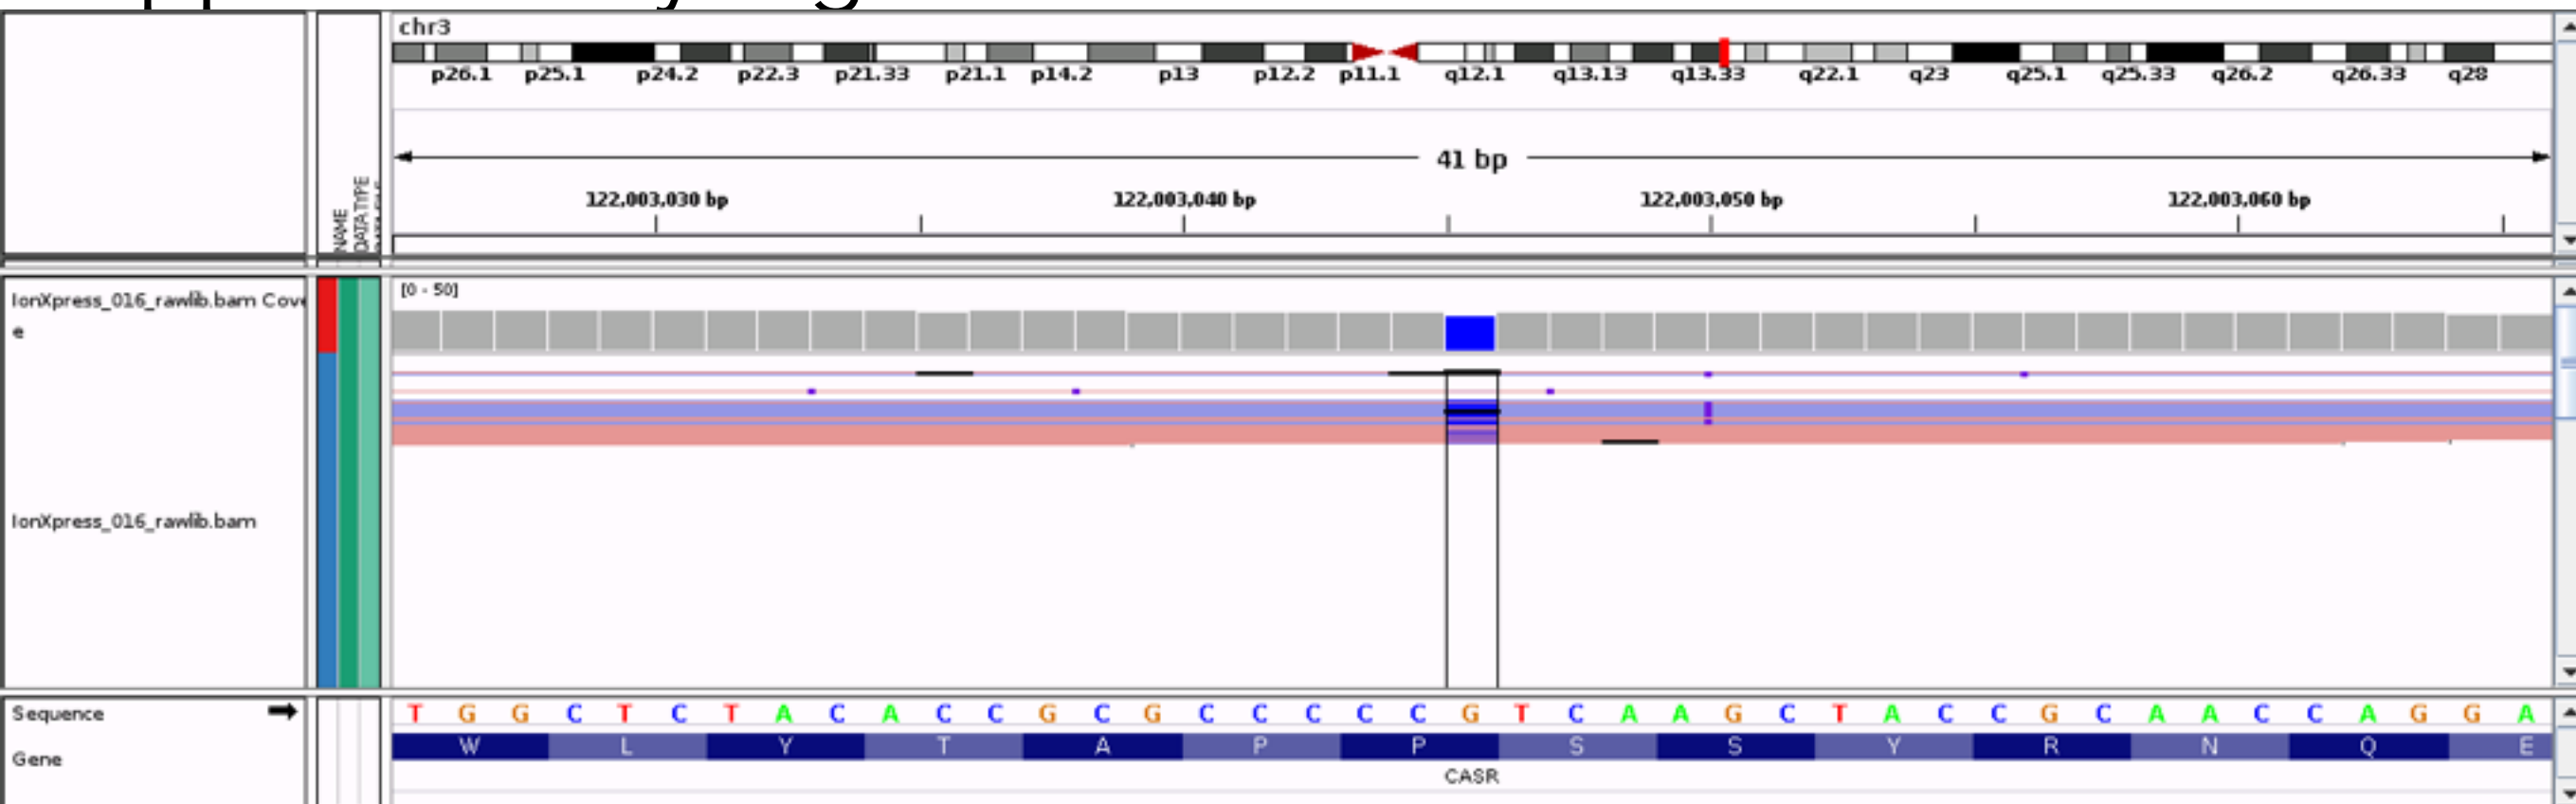

# Supplementary Figure9

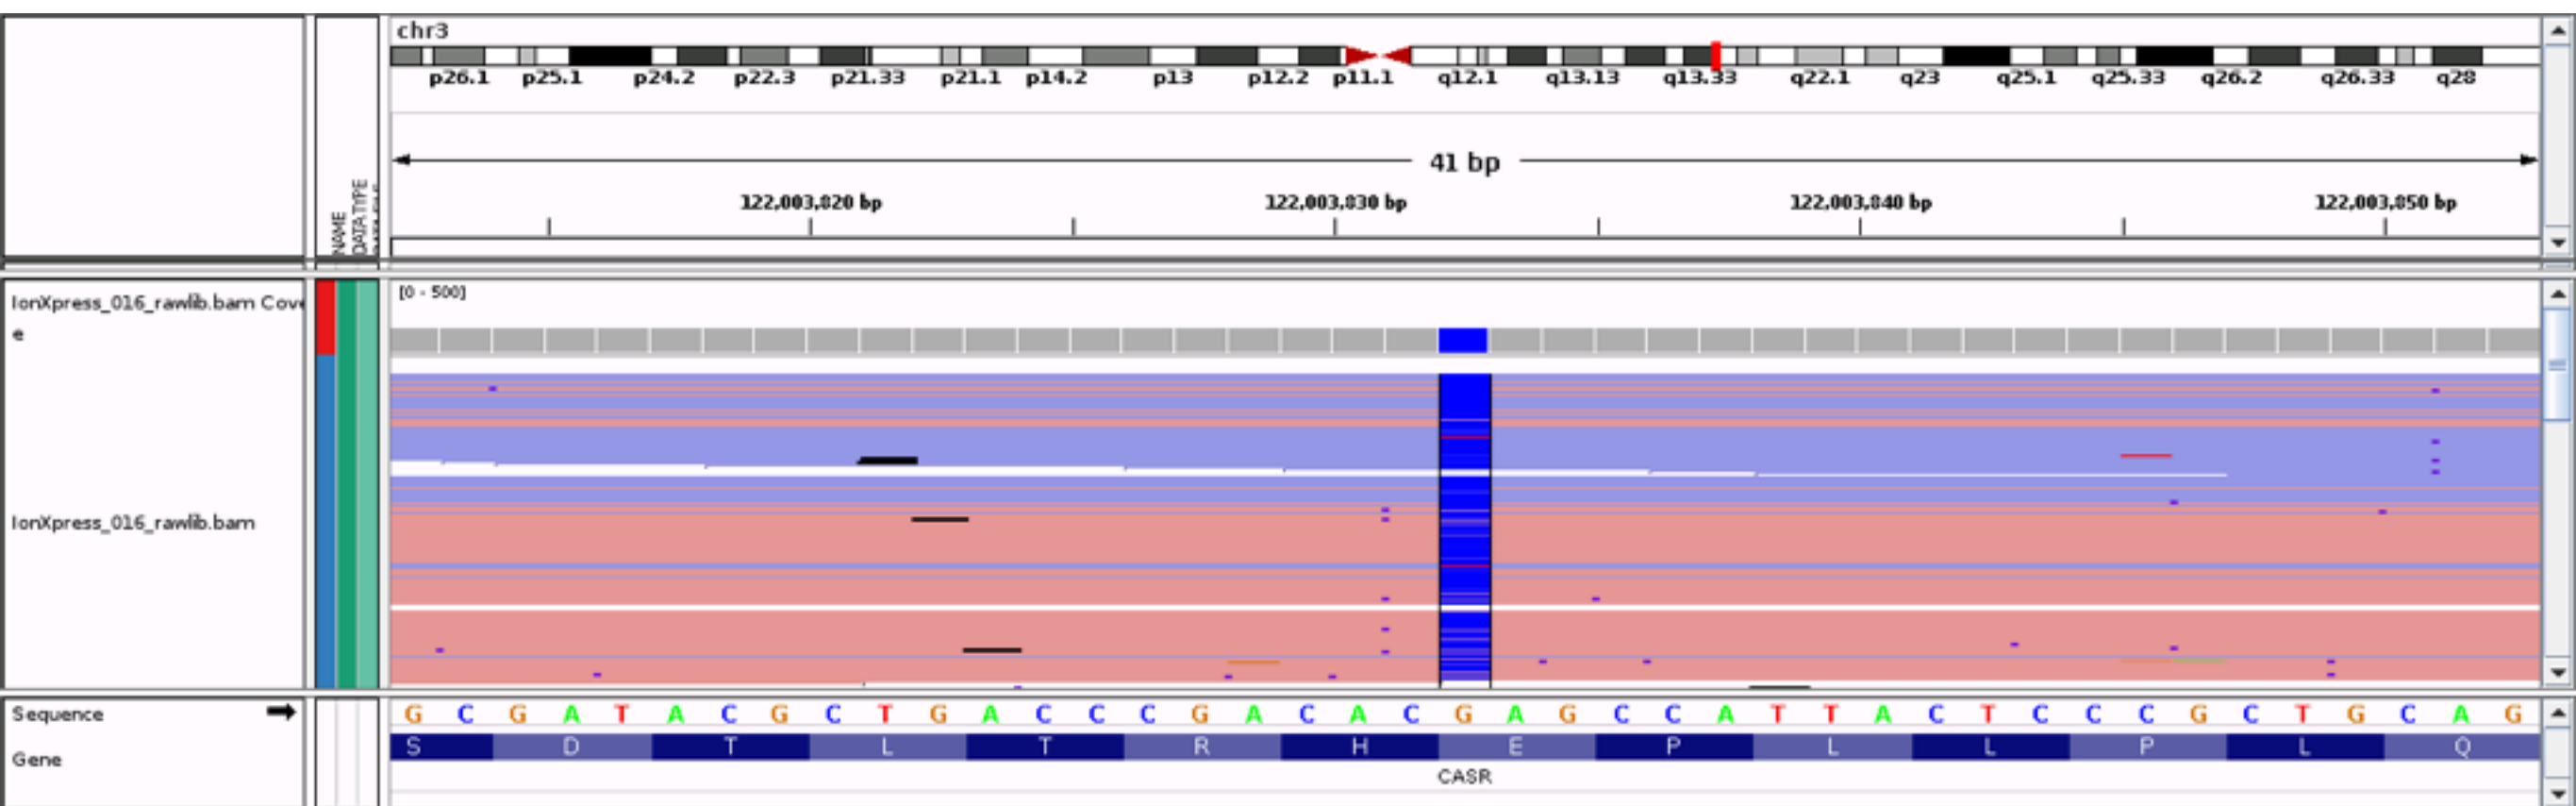

# Supplementary Figure10

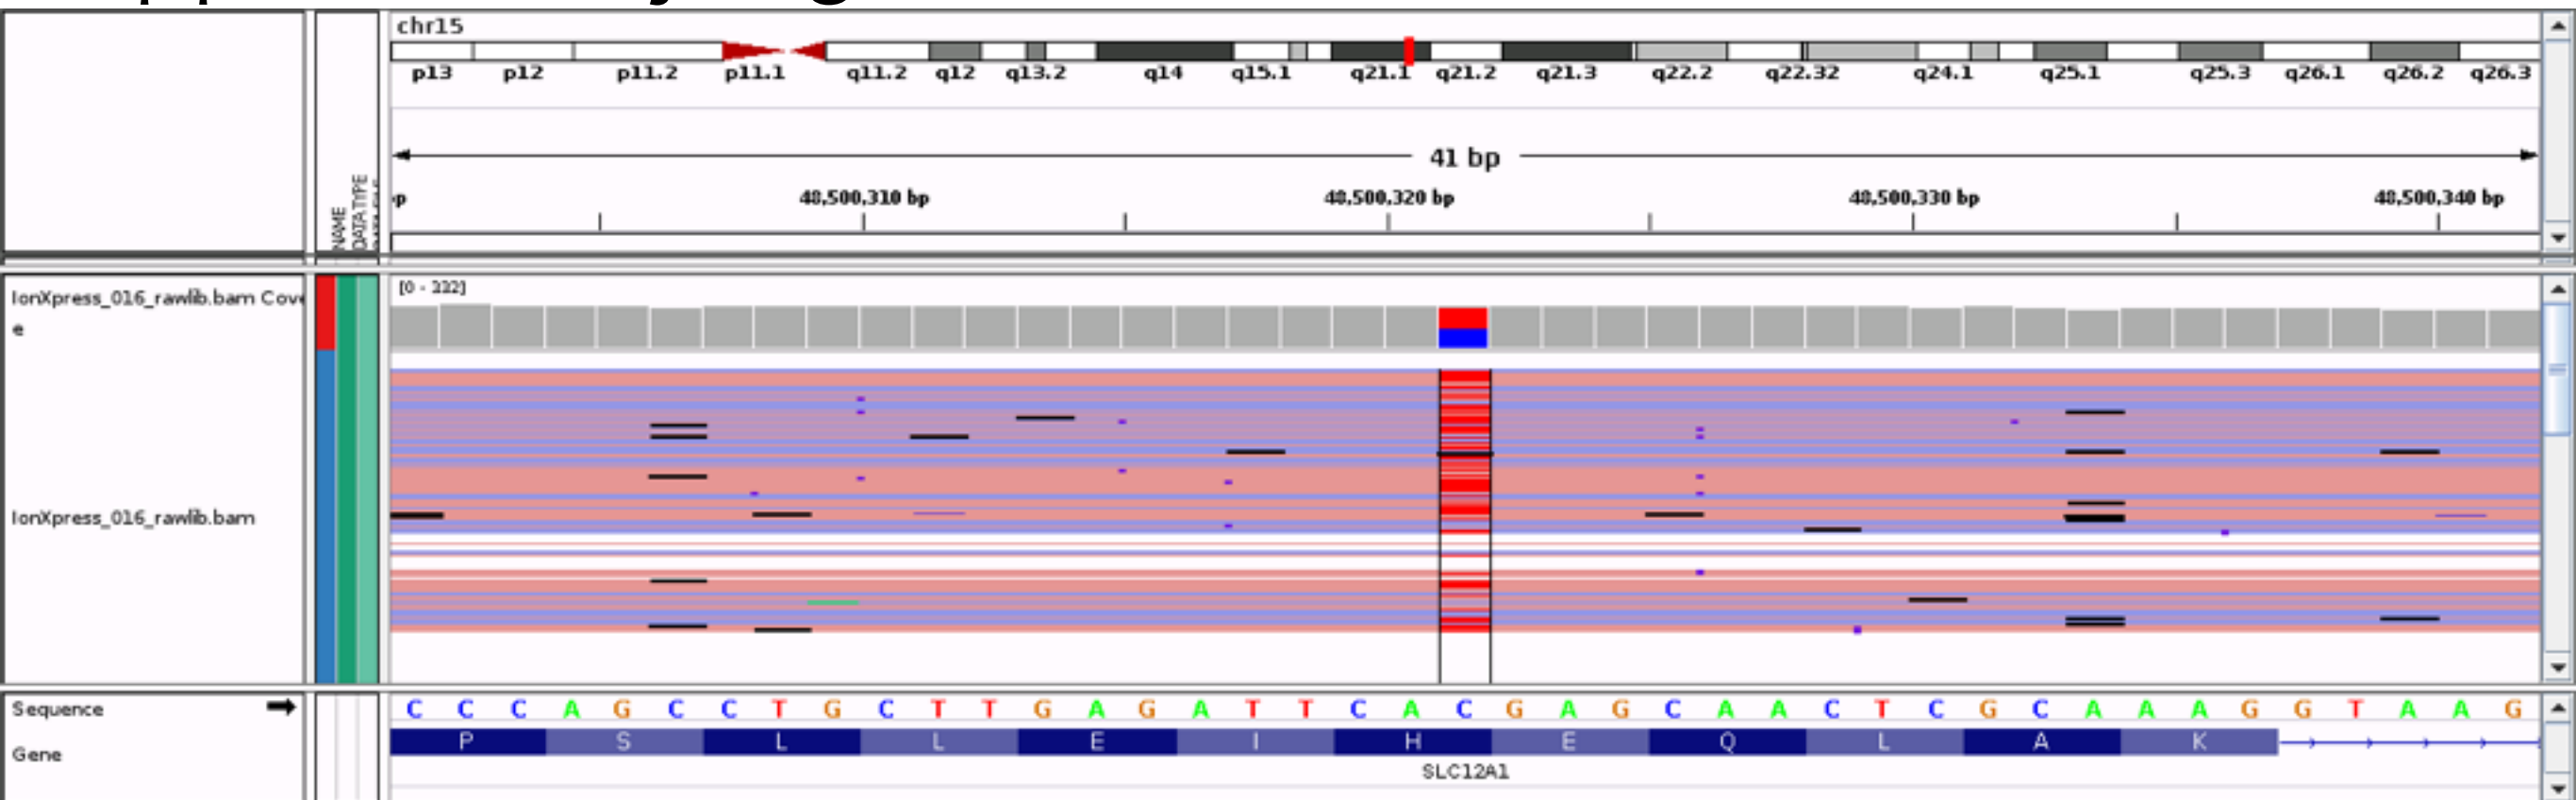

# Supplementary Figure1 1

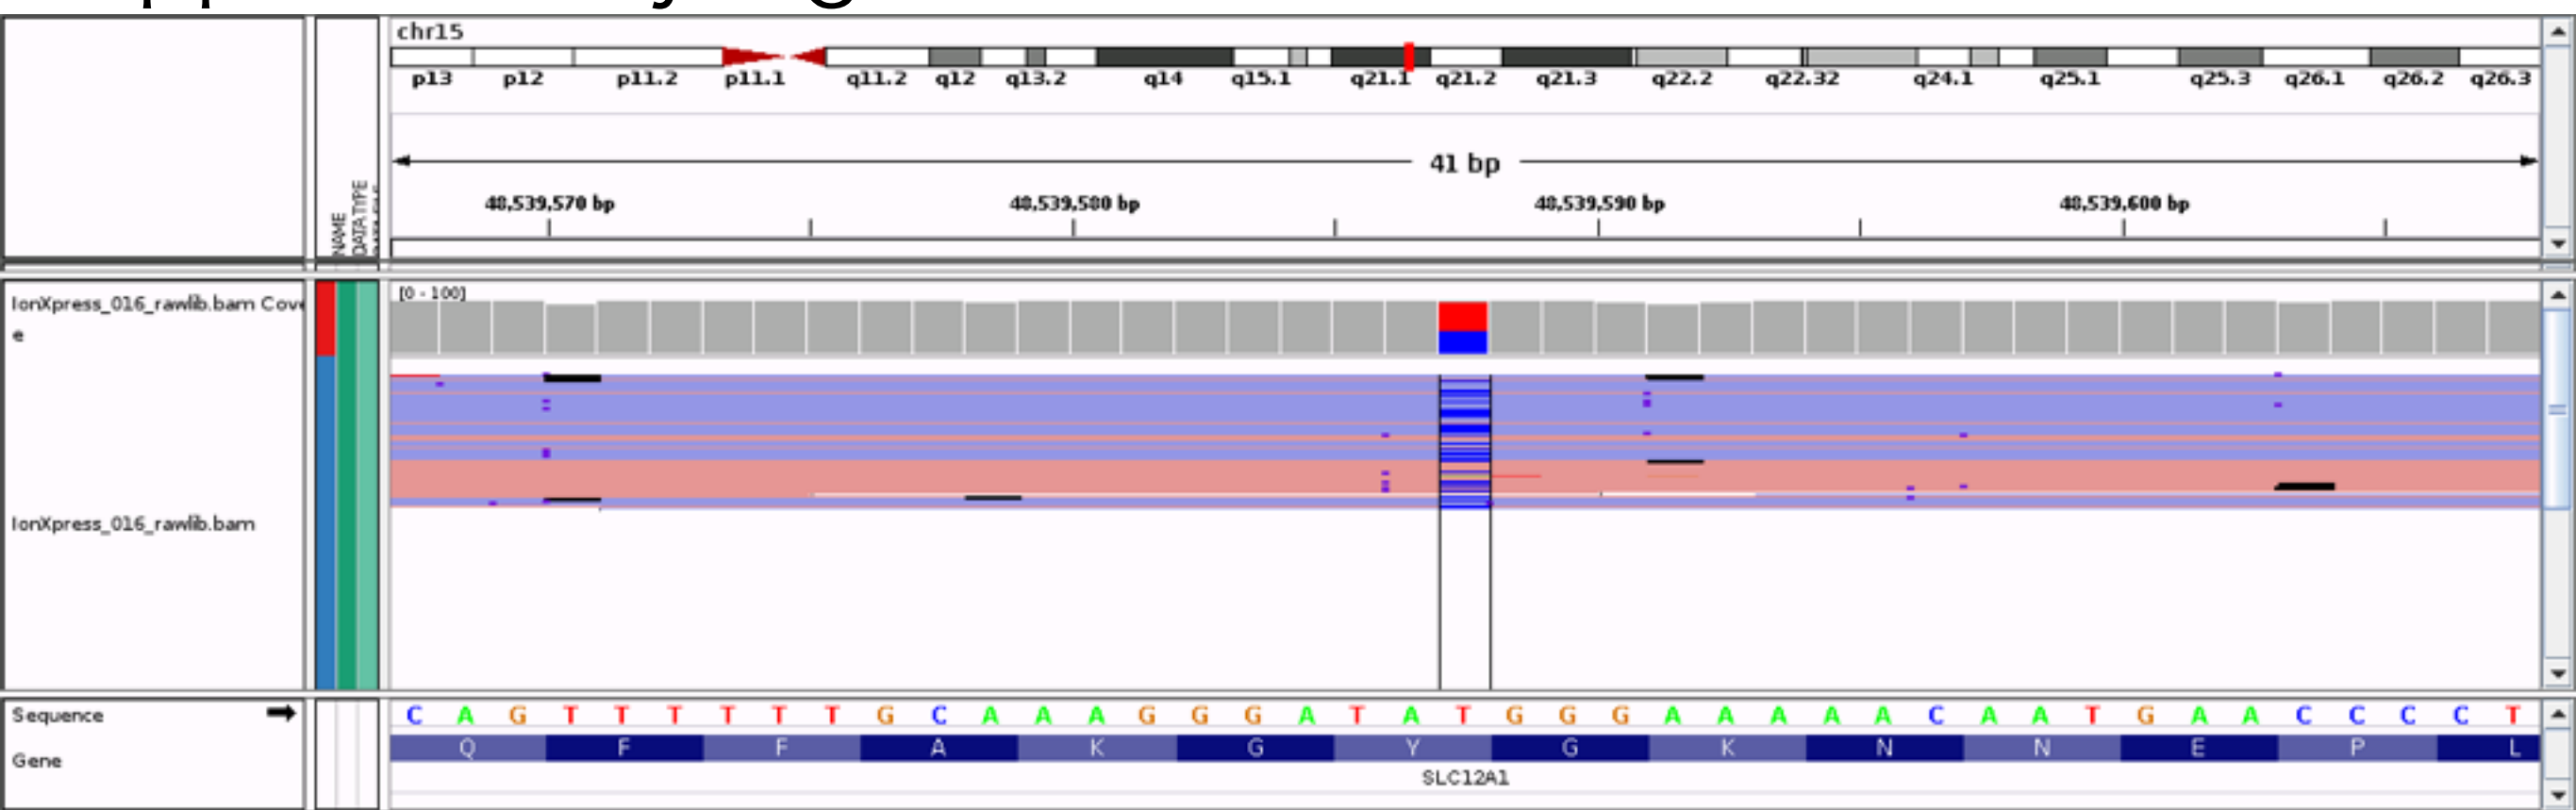

# Supplementary Figure1 2

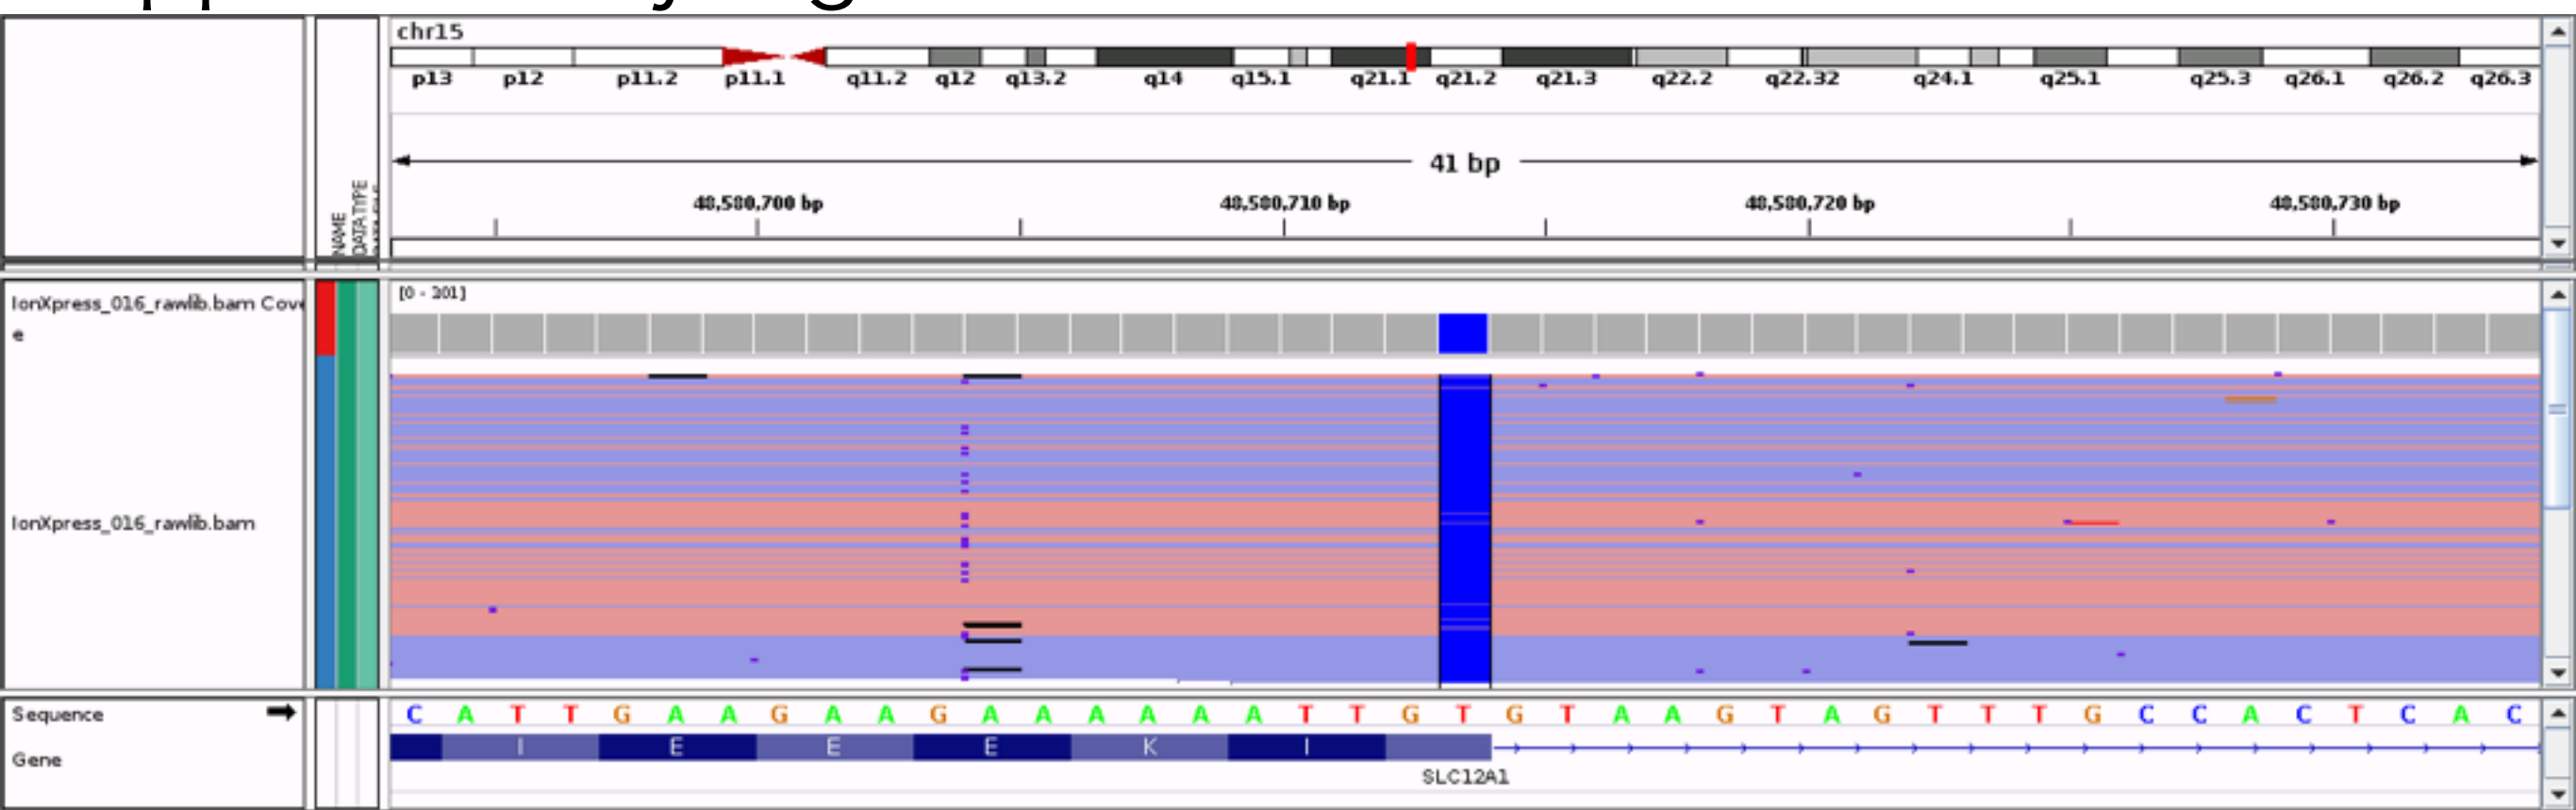

Supplementary Figure13

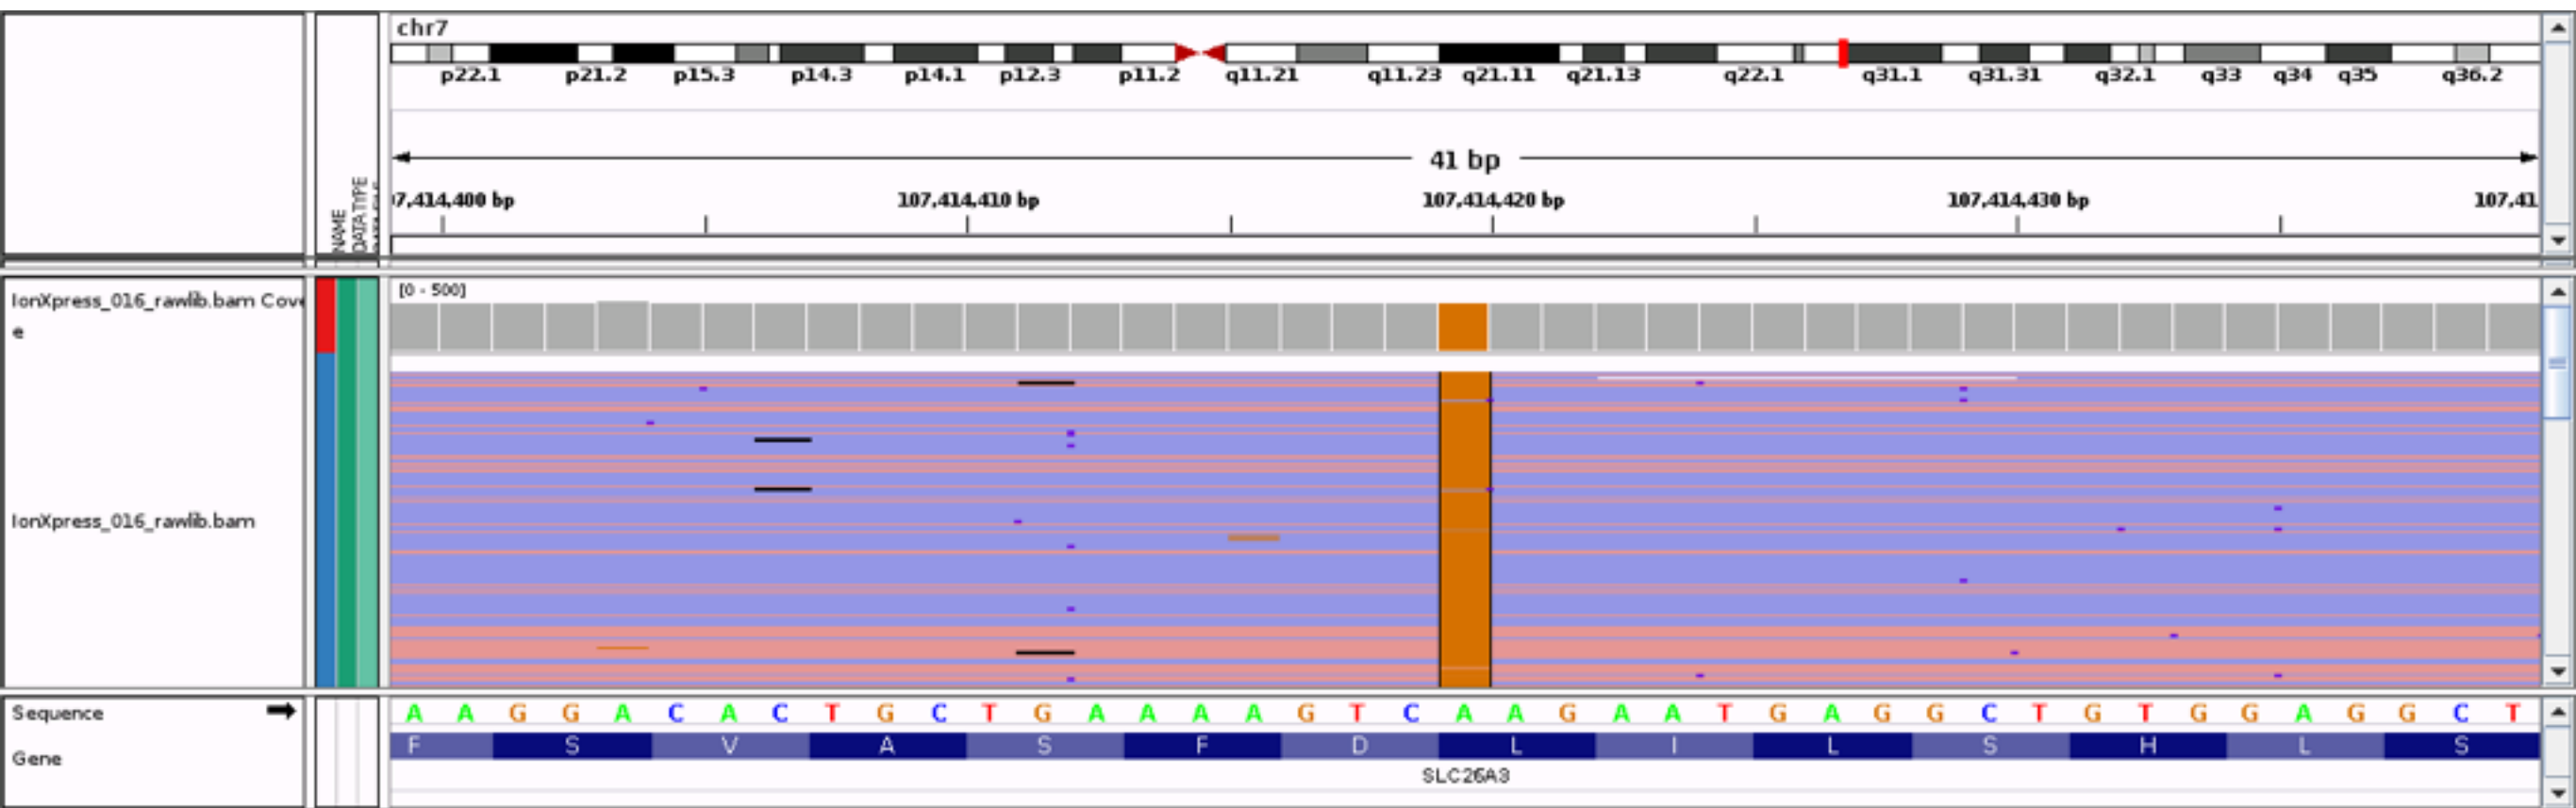

Supplementary Figure14

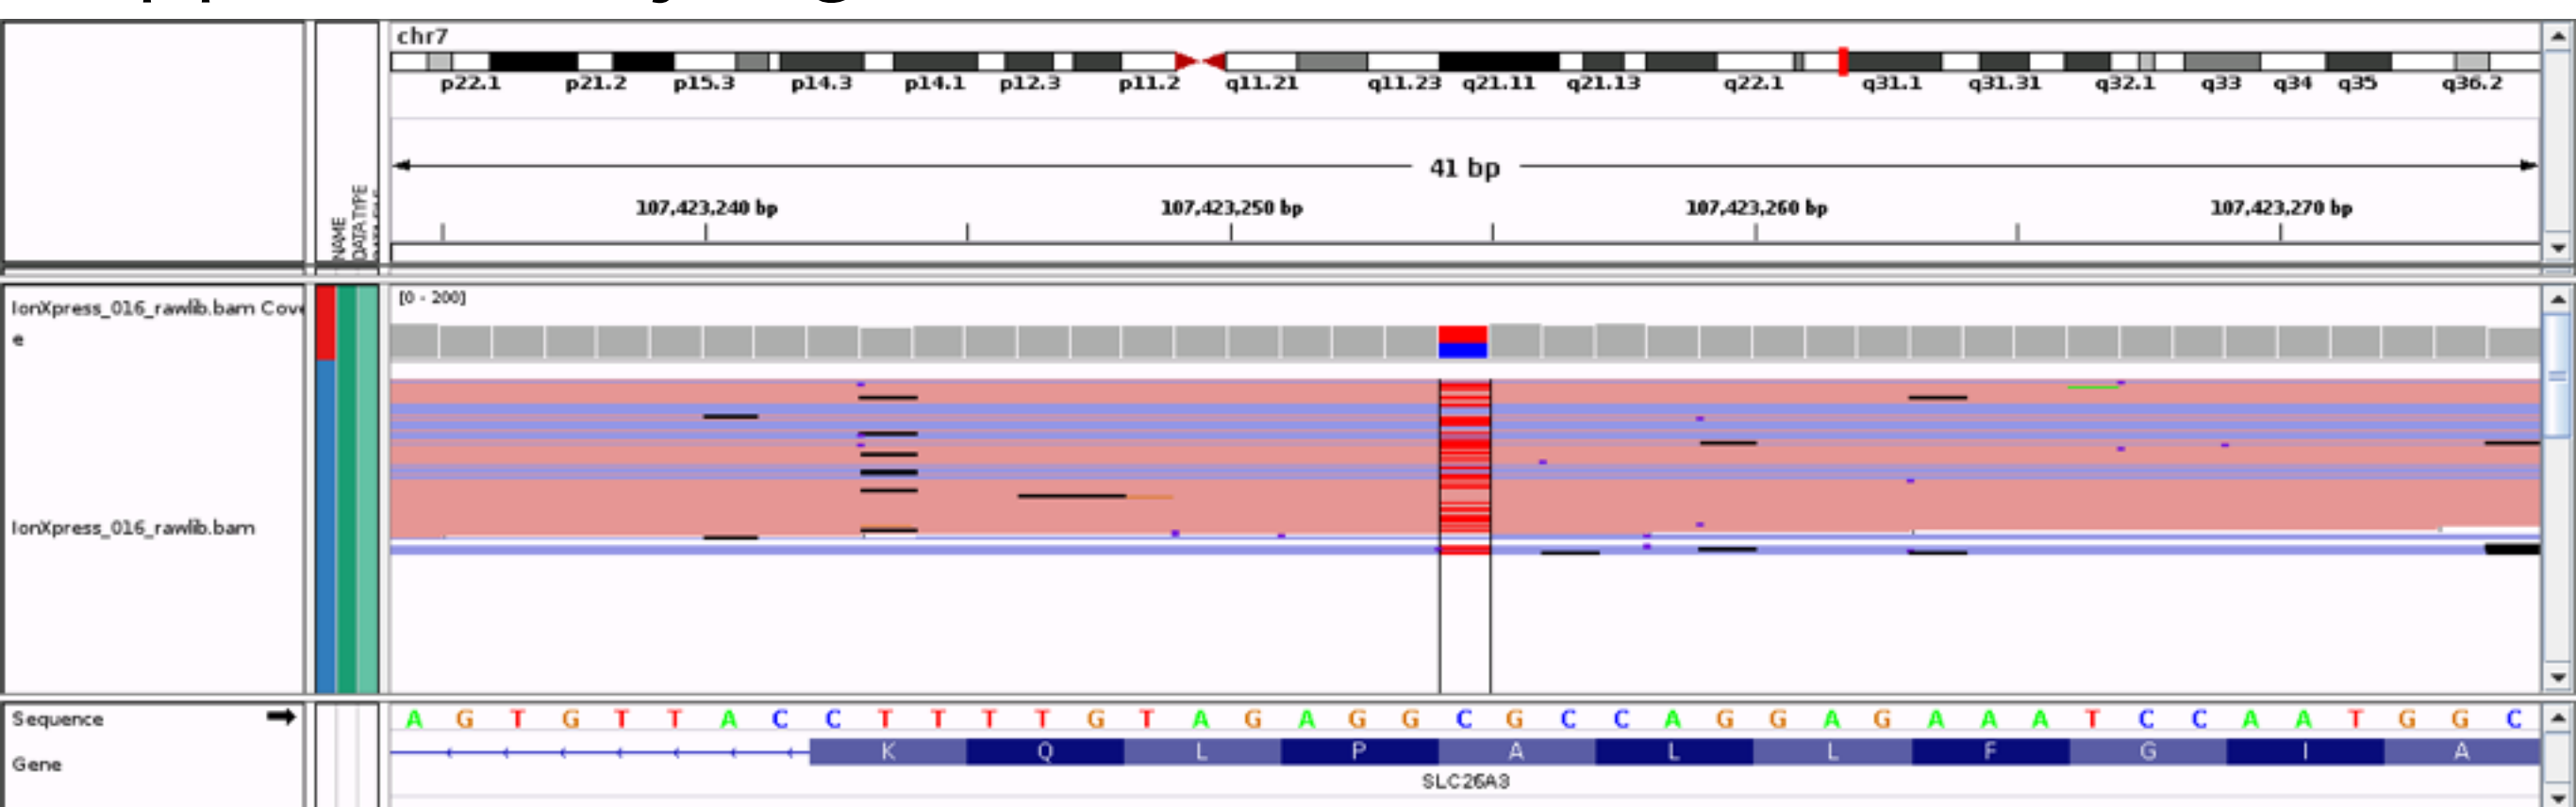



# Supplementary Figure 15

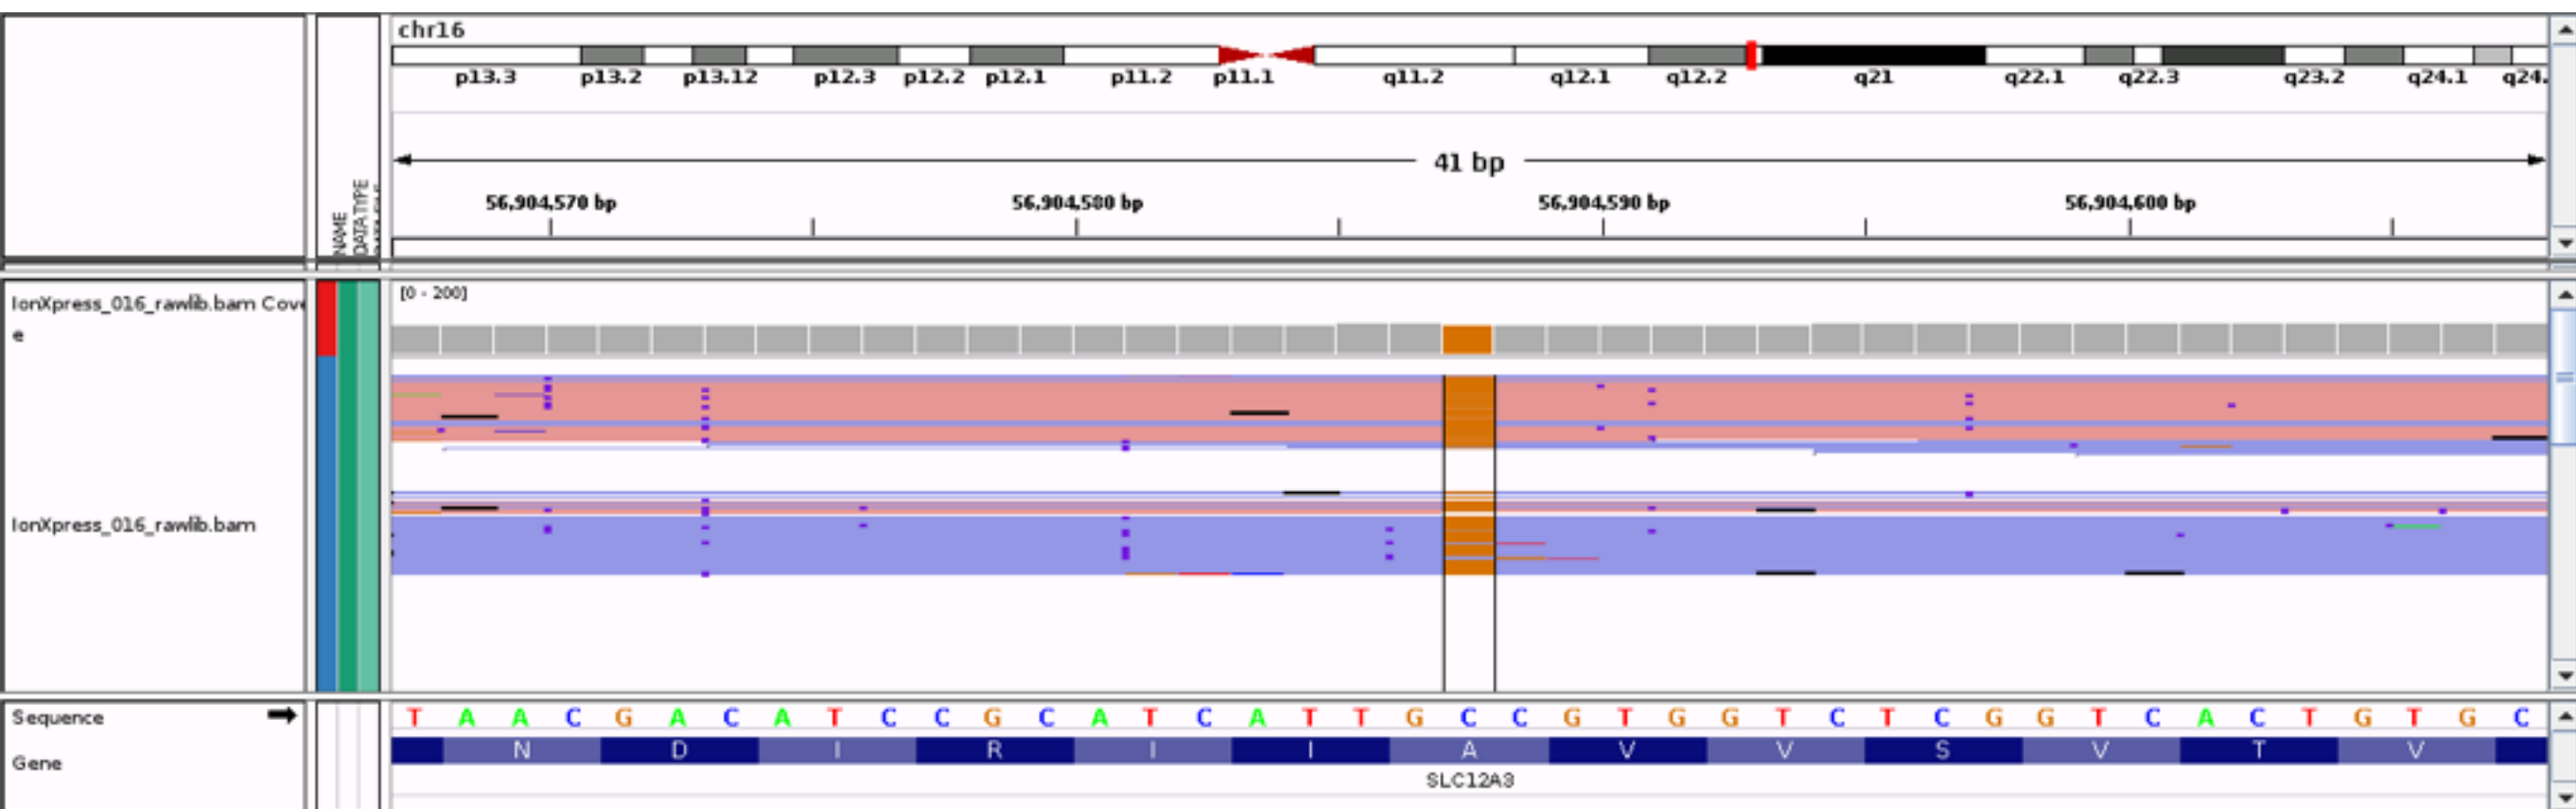

# Supplementary Figure 16

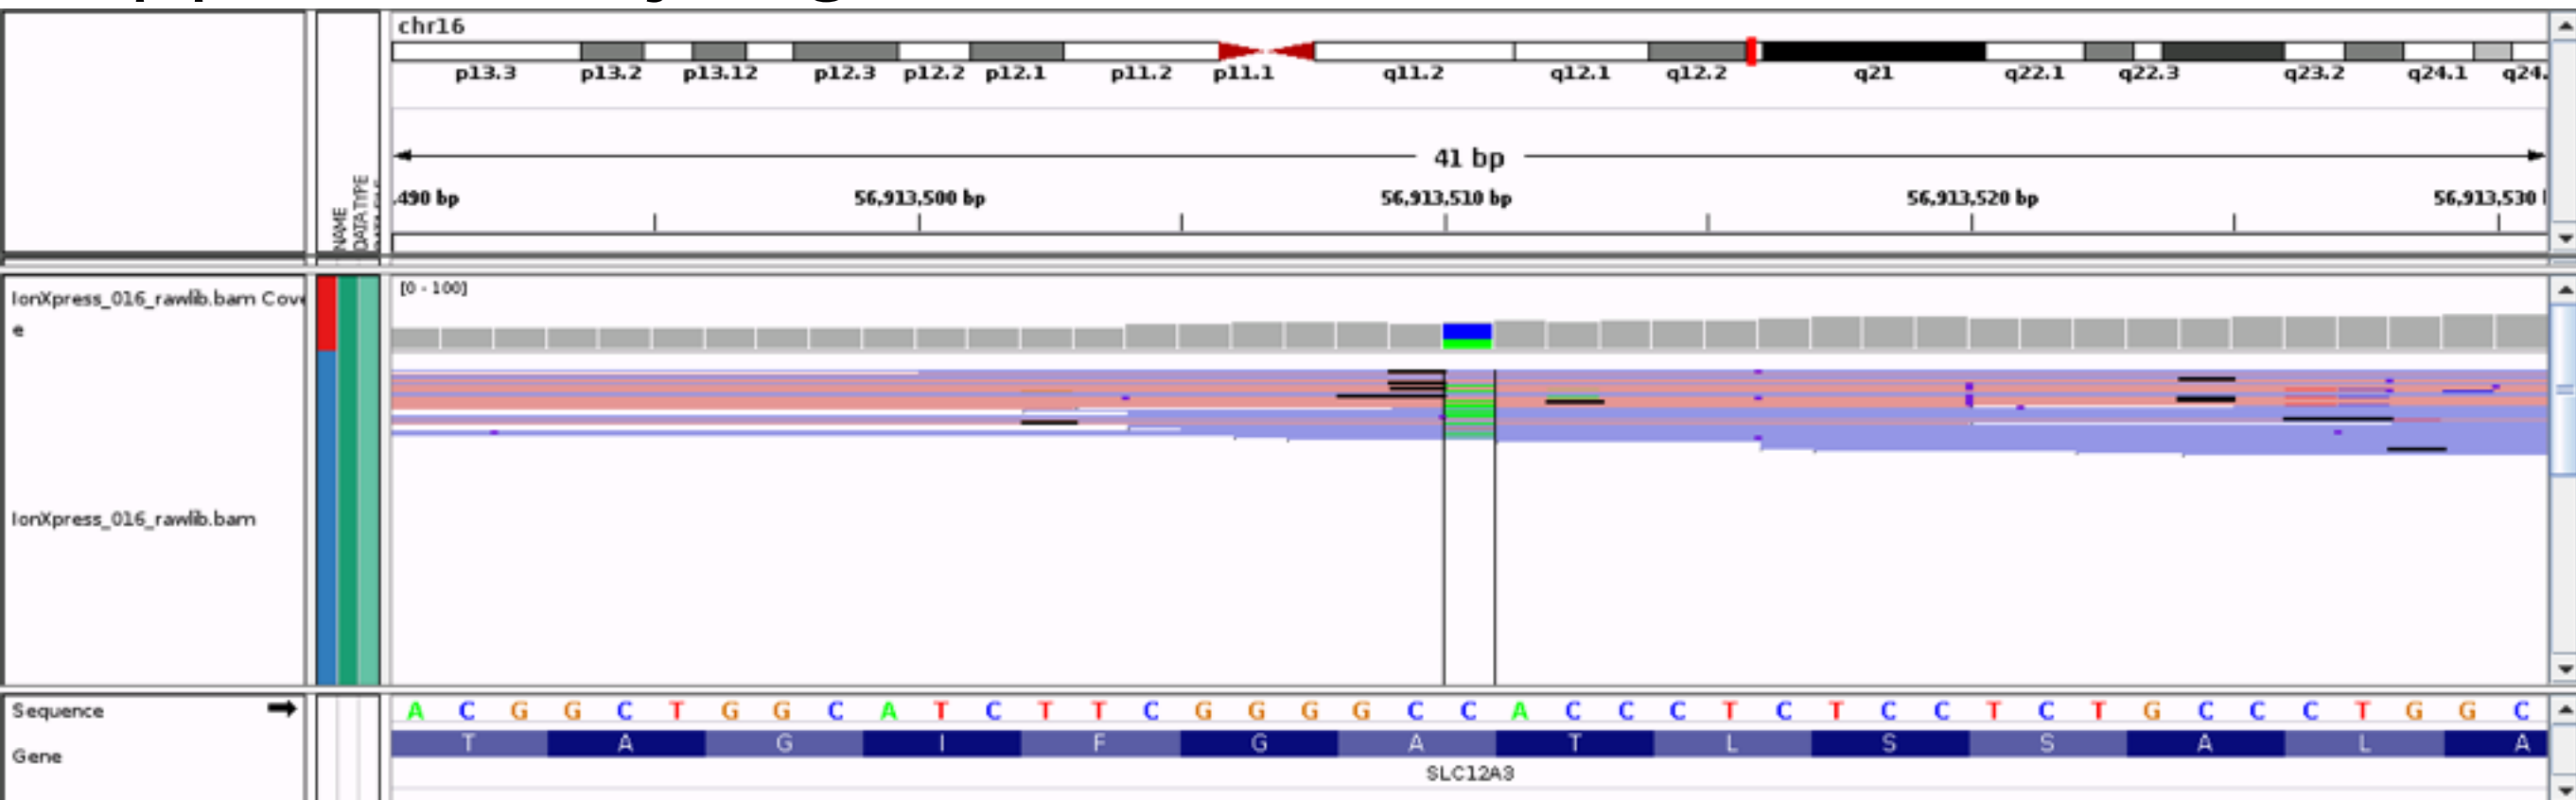



# Supplementary Figure 17

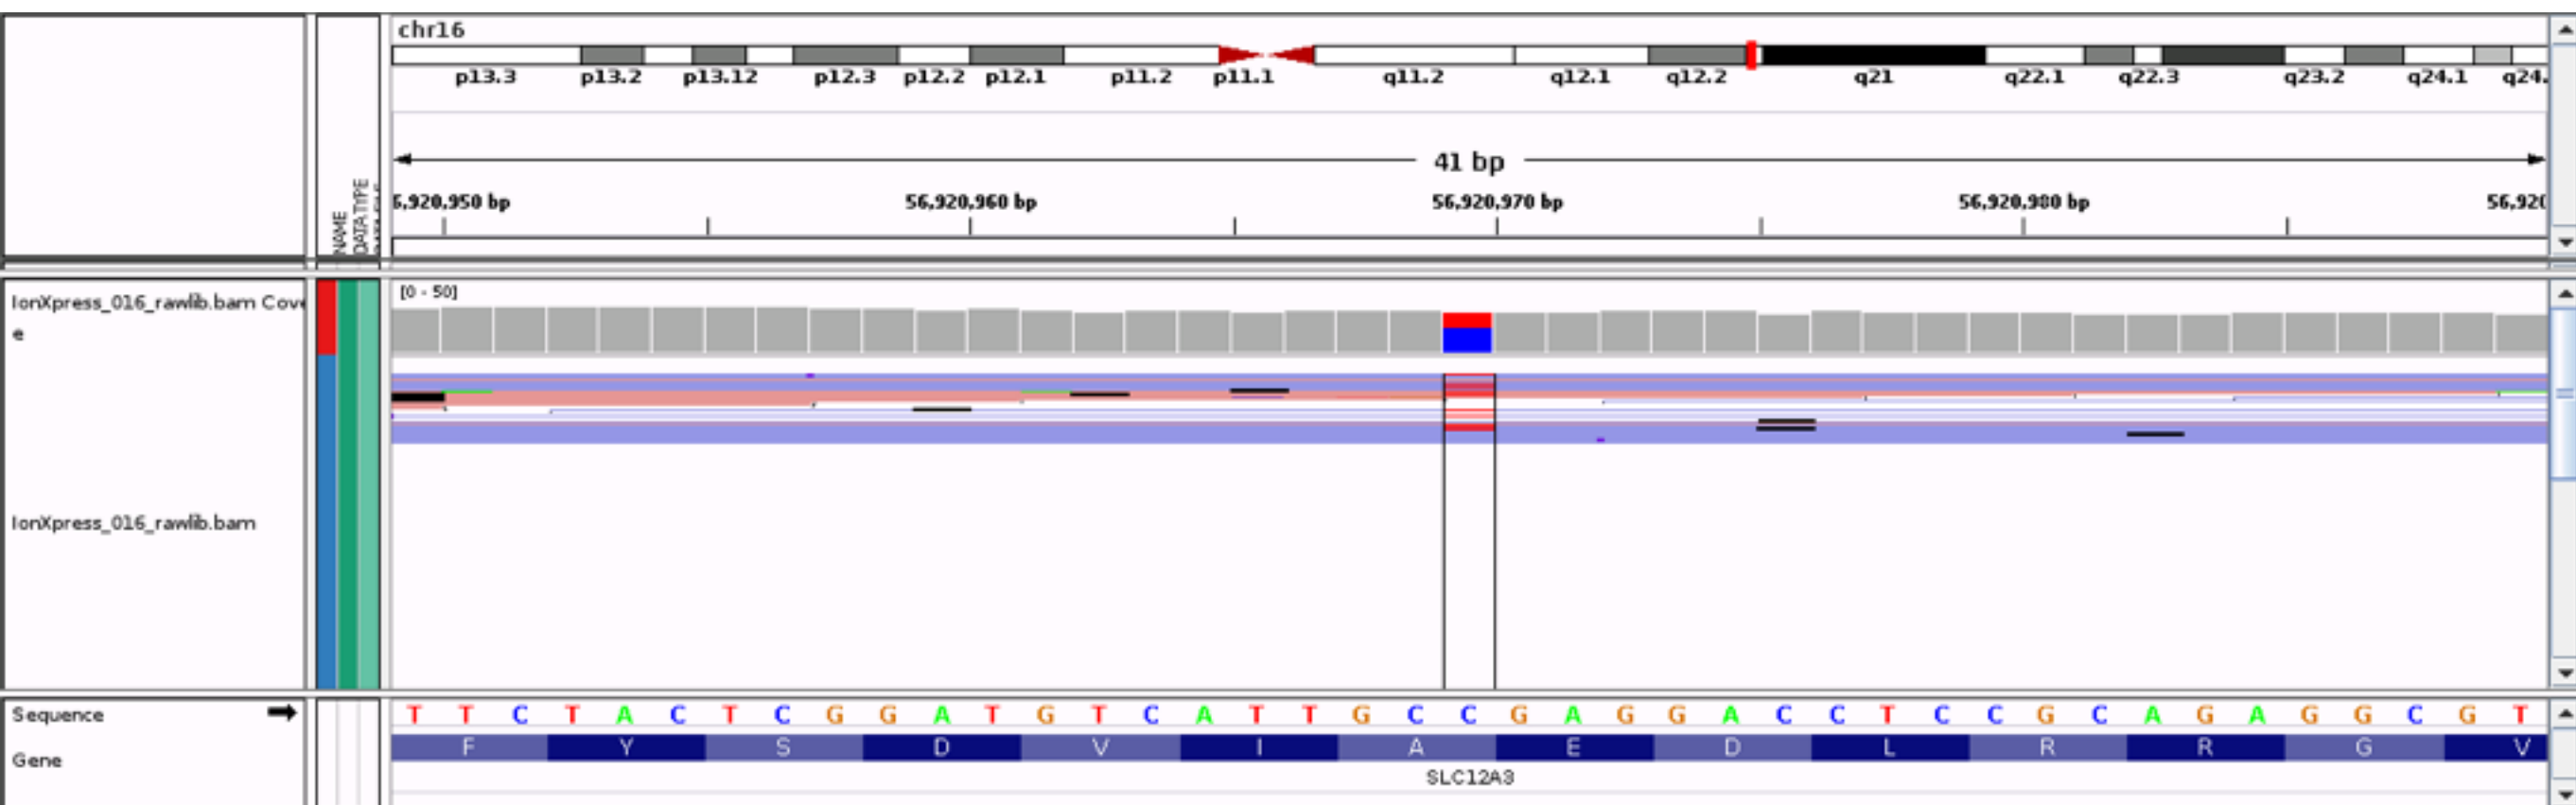

# Supplementary Figure 18

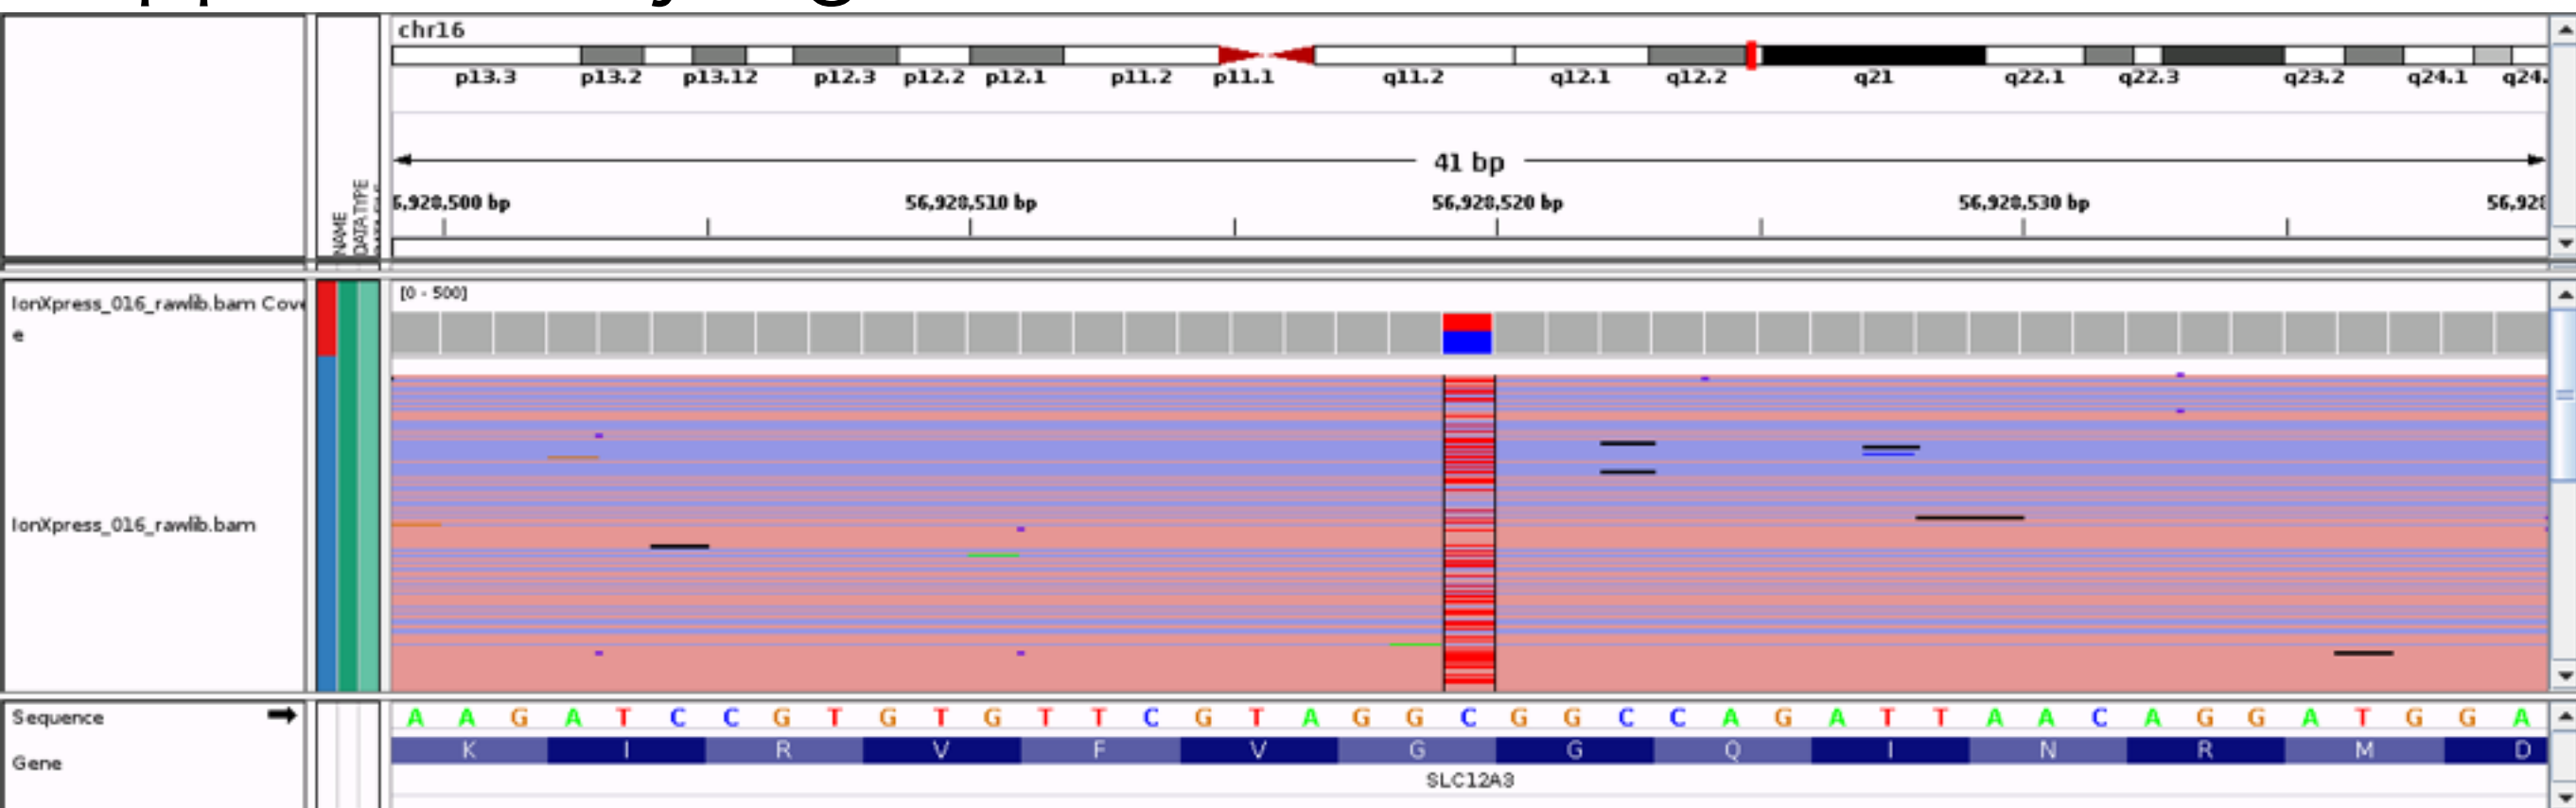

Supplement: s1 [file s1]
